# Supplementary material for: Mass Spectrometric Evaluation of β-Cyclodextrins as Potential Hosts for Titanocene Dichloride
Source: MDPI journal article supplement (doi:10.3390/ijms22189789), 2021-09-10
Supplement: s1 [file s1]

# Supplementary Materials

## Mass spectrometric investigation of $\beta$ -cyclodextrins as hosts for titanocene dichloride

Pia S. Bruni<sup>1</sup> and Stefan Schürch<sup>1,\*</sup>

<sup>1</sup> Department of Chemistry, Biochemistry and Pharmaceutical Sciences, University of Bern, 3012 Bern, Switzerland; pia.bruni@unibe.ch

\* Correspondence: stefan.schuerch@unibe.ch

**Table S1.** Full scan mass spectrum of  $\beta$ -cyclodextrin in 50/50 H<sub>2</sub>O/MeCN (100% = 6.19E7).

**Table S2.** Full scan mass spectrum of phenylalanine in 50/50 H<sub>2</sub>O/MeCN (100% = 9.45E7).

**Table S3.** Full scan mass spectrum of oxaliplatin in 50/50 H<sub>2</sub>O/MeCN (100% = 5.01E6).

**Table S4.** Full scan mass spectrum of titanocene dichloride (Cp<sub>2</sub>TiCl<sub>2</sub>) in 50/50 H<sub>2</sub>O/MeCN +1% FA (100% = 2.33E7).

**Table S5.** Full scan mass spectrum of titanocene dichloride (Cp<sub>2</sub>TiCl<sub>2</sub>) in MeOH (100% = 7.30E5).

**Table S6.** Full scan mass spectrum of the  $\beta$ -cyclodextrin/phenylalanine mixture in 50/50 H<sub>2</sub>O/MeCN (100% = 2.75E7).

**Table S7.** Tandem mass spectrum of the  $\beta$ -cyclodextrin/phenylalanine mixture in 50/50 H<sub>2</sub>O/MeCN. Precursor ion:  $m/z$  1300.48, HCD at 16% NCE (37 eV), 100% = 9.23E5.

**Table S8.** Full scan mass spectrum of the  $\beta$ -cyclodextrin/oxaliplatin mixture in 50/50 H<sub>2</sub>O/MeCN (100% = 7.97E6).

**Table S9.** Tandem mass spectrum of the  $\beta$ -cyclodextrin/oxaliplatin mixture in 50/50 H<sub>2</sub>O/MeCN. Precursor ion:  $m/z$  1532.50, HCD at 14% NCE (38 eV), 100% = 1.64E5.

**Table S10.** Full scan mass spectrum of the  $\beta$ -cyclodextrin/titanocene dichloride mixture in 50/50 H<sub>2</sub>O/MeCN (100% = 2.19E7).

**Table S11.** Tandem mass spectrum of the  $\beta$ -cyclodextrin/titanocene dichloride mixture in 50/50 H<sub>2</sub>O/MeCN. Precursor ion: [ $\beta$ CD+Cp<sub>2</sub>Ti-H]<sup>+</sup>  $m/z$  1311.40, HCD at 20% NCE (47 eV), 100% = 8.82E5.

**Table S12.** Full scan mass spectrum of the sucrose/titanocene dichloride mixture in 50/50 H<sub>2</sub>O/MeCN (100% = 3.67E7).

**Table S13.** Tandem mass spectrum of the sucrose/titanocene dichloride mixture in 50/50 H<sub>2</sub>O/MeCN. Precursor ion: [suc+Cp<sub>2</sub>Ti-H]<sup>+</sup>  $m/z$  519.20, HCD at 19% NCE (17 eV), 100% = 2.17E5.

**Table S14.** Full scan mass spectrum of the maltose/titanocene dichloride mixture in 50/50 H<sub>2</sub>O/MeCN (100% = 1.06E7).

**Table S15.** Tandem mass spectrum of the maltose/titanocene dichloride mixture in 50/50 H<sub>2</sub>O/MeCN. Precursor ion: [maltose+Cp<sub>2</sub>Ti-H]<sup>+</sup>  $m/z$  519.20, HCD at 20% NCE (18 eV), 100% = 2.20E5.

**Table S16.** Full scan mass spectrum of DM $\beta$ -cyclodextrin in 50/50 H<sub>2</sub>O/MeCN +1% FA (100% = 2.94E7).

**Table S17.** Full scan mass spectrum of TM $\beta$ -cyclodextrin in 50/50 H<sub>2</sub>O/MeCN (100% = 4.86E6).

**Table S18.** Full scan mass spectrum of the DM $\beta$ -cyclodextrin/phenylalanine mixture in 50/50 H<sub>2</sub>O/MeCN (100% = 1.08E7).

**Table S19.** Tandem mass spectrum of the DM $\beta$ -cyclodextrin/phenylalanine mixture in 50/50 H<sub>2</sub>O/MeCN. Precursor ion: [DM $\beta$ CD+Phe+H]<sup>+</sup>  $m/z$  1496.70, HCD at 15% NCE (40 eV), 100% = 1.08E6.

**Table S20.** Full scan mass spectrum of the DM $\beta$ -cyclodextrin/titanocene dichloride mixture in 50/50 H<sub>2</sub>O/MeCN (100% = 7.57E7).

**Table S21.** Tandem mass spectrum of the DM $\beta$ -cyclodextrin/titanocene dichloride mixture in 50/50 H<sub>2</sub>O/MeCN.

Precursor ion: [DM $\beta$ CD+Cp<sub>2</sub>Ti-H]<sup>+</sup>  $m/z$  1507.60, HCD at 20% NCE (54 eV), 100% = 1.18E6.

**Table S22.** Full scan mass spectrum of the TM $\beta$ -cyclodextrin/phenylalanine mixture in 50/50 H<sub>2</sub>O/MeCN (100% = 7.74E7).

**Table S23.** Tandem mass spectrum of the TM $\beta$ -cyclodextrin/phenylalanine mixture in 50/50 H<sub>2</sub>O/MeCN. Precursor ion: [TM $\beta$ CD+Phe+H]<sup>+</sup>  $m/z$  1594.80, HCD at 15% NCE (43 eV), 100% = 2.22E5.

**Table S24.** Full scan mass spectrum of the TM $\beta$ -cyclodextrin/titanocene dichloride mixture in 50/50 H<sub>2</sub>O/MeCN (100% = 4.65E7).

**Table S25.** Tandem mass spectrum of the TM $\beta$ -cyclodextrin/phenylalanine mixture in 50/50 H<sub>2</sub>O/MeCN + 1% FA. Precursor ion: [TM $\beta$ CD\*+Phe+H]<sup>+</sup> with a total of 19 methyl groups at  $m/z$  1566.80, HCD at 15% NCE (42 eV), 100% = 3.53E5.

**Table S26.** Tandem mass spectrum of the TM $\beta$ -cyclodextrin/phenylalanine mixture in 50/50 H<sub>2</sub>O/MeCN + 1% FA. Precursor ion: [TM $\beta$ CD\*+Phe+H]<sup>+</sup> with a total of 20 methyl groups at  $m/z$  1580.80, HCD at 15% NCE (42 eV), 100% = 6.11E5.

**Figure S1.** Tandem mass spectra of the  $\beta$ -cyclodextrin/phenylalanine mixture underlying the breakdown curve of [ $\beta$ CD+Phe+H]<sup>+</sup>.

**Figure S2.** Tandem mass spectra of the DM $\beta$ -cyclodextrin/phenylalanine mixture underlying the breakdown curve of [DM $\beta$ CD+Phe+H]<sup>+</sup>.

**Figure S3.** Tandem mass spectra of the  $\beta$ -cyclodextrin/titanocene dichloride mixture underlying the breakdown curve of [ $\beta$ CD+Cp<sub>2</sub>Ti-H]<sup>+</sup>.

**Figure S4.** Tandem mass spectra of the  $\beta$ -cyclodextrin/oxaliplatin mixture underlying the breakdown curve of [ $\beta$ CD+oxaliPt+H]<sup>+</sup>.

**Table S1.** Full scan mass spectrum of  $\beta$ -cyclodextrin in 50/50 H<sub>2</sub>O/MeCN (100% = 6.19E7).

20190318\_b-CD\_pos #20-45 RT: 0.52-1.21 AV: 26 NL: 6.19E7  
T: FTMS + p NSI Full ms [200.00-2000.00]

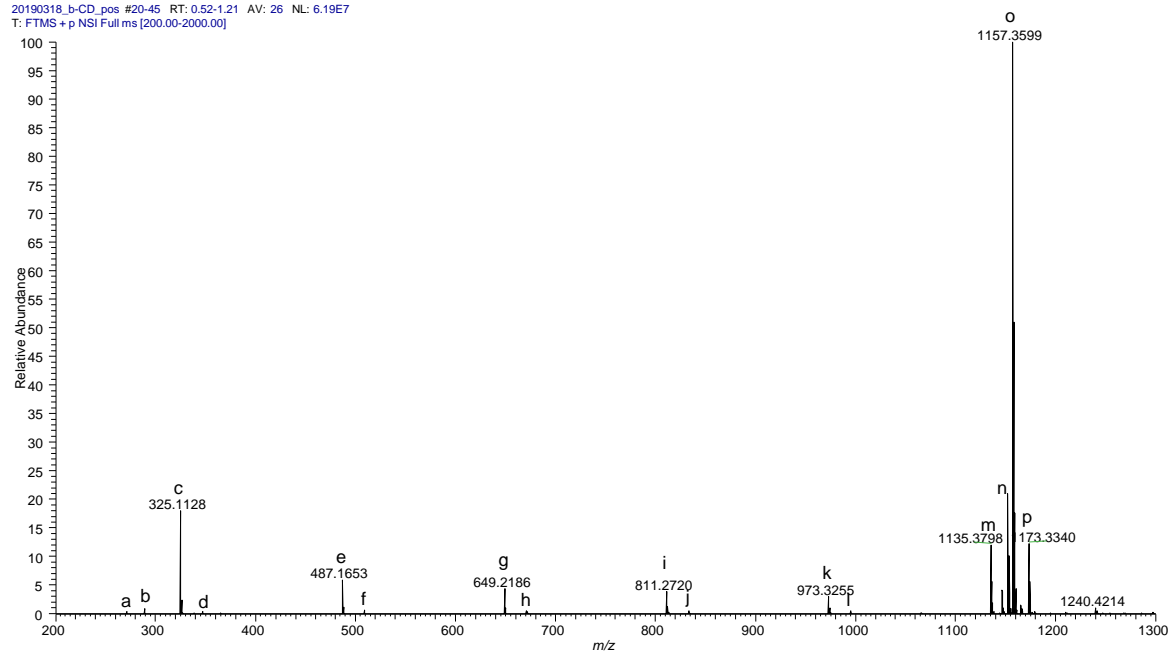

|   | <i>m/z</i> experimental | Name                                                 | <i>m/z</i> calculation | Error    |
|---|-------------------------|------------------------------------------------------|------------------------|----------|
| a | 271.0812                | [glc <sub>2</sub> -3H <sub>2</sub> O+H] <sup>+</sup> | 271.0812               | 0.0 ppm  |
| b | 289.0917                | [glc <sub>2</sub> -2H <sub>2</sub> O+H] <sup>+</sup> | 289.0918               | -0.3 ppm |
| c | 325.1128                | [glc <sub>2</sub> +H] <sup>+</sup>                   | 325.1129               | -0.3 ppm |
| d | 347.0947                | [glc <sub>2</sub> +Na] <sup>+</sup>                  | 347.0949               | -0.6 ppm |
| e | 487.1653                | [glc <sub>3</sub> +H] <sup>+</sup>                   | 487.1657               | -0.8 ppm |
| f | 509.1471                | [glc <sub>3</sub> +Na] <sup>+</sup>                  | 509.1477               | -1.2 ppm |
| g | 649.2186                | [glc <sub>4</sub> +H] <sup>+</sup>                   | 649.2186               | 0.0 ppm  |
| h | 671.2004                | [glc <sub>4</sub> +Na] <sup>+</sup>                  | 671.2005               | -0.1 ppm |
| i | 811.2720                | [glc <sub>5</sub> +H] <sup>+</sup>                   | 811.2714               | 0.7 ppm  |
| j | 833.2538                | [glc <sub>5</sub> +Na] <sup>+</sup>                  | 833.2533               | 0.6 ppm  |
| k | 973.3255                | [glc <sub>6</sub> +H] <sup>+</sup>                   | 973.3242               | 1.3 ppm  |
| l | 995.3073                | [glc <sub>6</sub> +Na] <sup>+</sup>                  | 995.3062               | 1.1 ppm  |
| m | 1135.3798               | [ $\beta$ CD+H] <sup>+</sup>                         | 1135.3770              | 2.5 ppm  |
| n | 1152.4060               | [ $\beta$ CD+NH <sub>4</sub> ] <sup>+</sup>          | 1152.4036              | 2.1 ppm  |
| o | 1157.3599               | [ $\beta$ CD+Na] <sup>+</sup>                        | 1157.3590              | 0.8 ppm  |
| p | 1173.3340               | [ $\beta$ CD+K] <sup>+</sup>                         | 1173.3329              | 0.9 ppm  |

**Table S2.** Full scan mass spectrum of phenylalanine in 50/50 H<sub>2</sub>O/MeCN (100% = 9.45E7).

20210618\_Phe\_pos #40-43 RT: 1.09-1.17 AV: 4 NL: 9.45E7  
T: FTMS + p NSI Full ms [80.00-500.00]

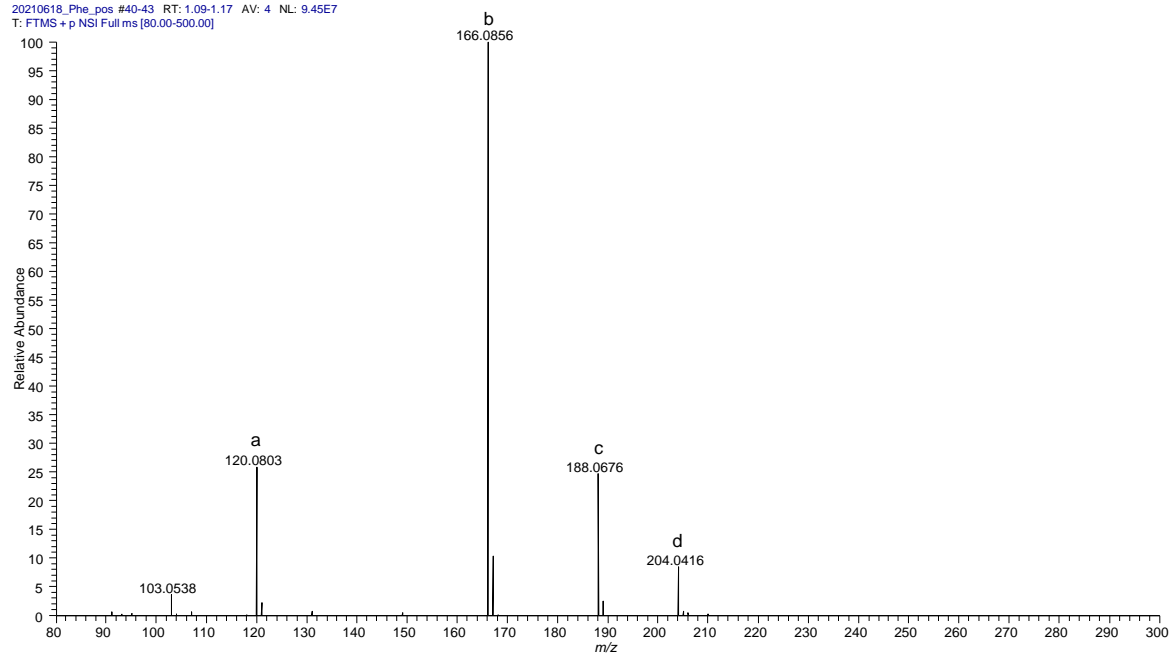

|   | <i>m/z</i> experimental | Name                    | <i>m/z</i> calculation | Error    |
|---|-------------------------|-------------------------|------------------------|----------|
| a | 120.0803                | [Imm(Phe)] <sup>+</sup> | 120.0808               | -4.2 ppm |
| b | 166.0856                | [Phe+H] <sup>+</sup>    | 166.0863               | -4.2 ppm |
| c | 188.0676                | [Phe+Na] <sup>+</sup>   | 188.0682               | -3.2 ppm |
| d | 204.0416                | [Phe+K] <sup>+</sup>    | 204.0421               | -2.5 ppm |

**Table S3.** Full scan mass spectrum of oxaliplatin in 50/50 H<sub>2</sub>O/MeCN (100% = 5.01E6).20190612\_oxaliPt\_pos #132-145 RT: 3.65-4.01 AV: 14 NL: 5.01E6  
T: FTMS + p NSI Full ms [50.00-1000.00]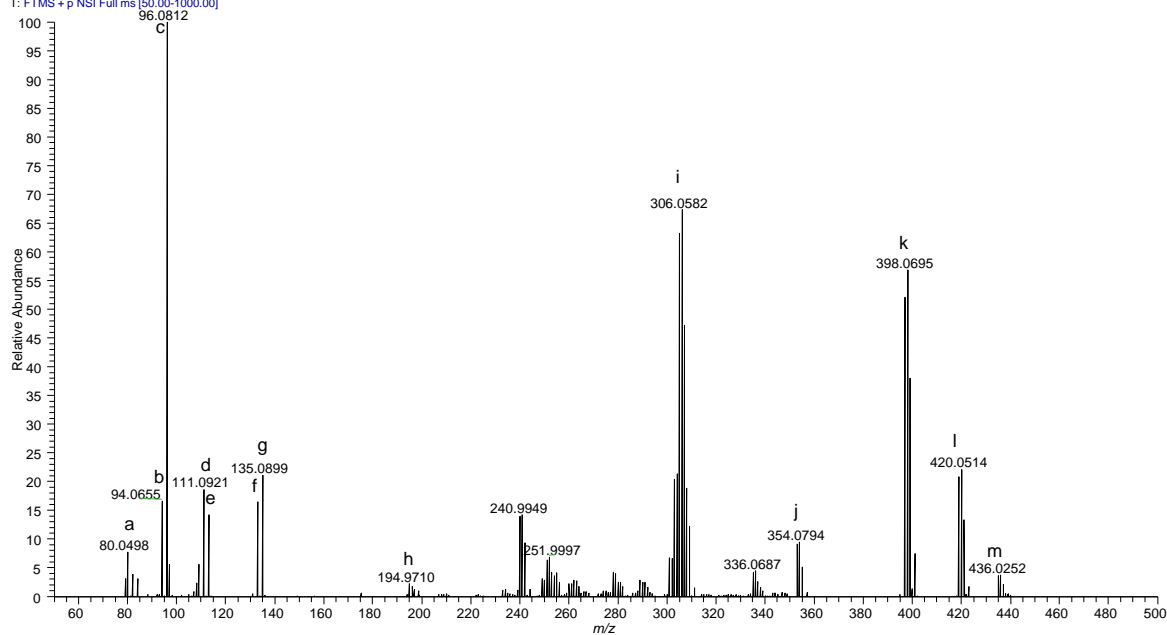

|   | <i>m/z</i> experimental | Name                                                                   | <i>m/z</i> calculation | Error   |
|---|-------------------------|------------------------------------------------------------------------|------------------------|---------|
| a | 80.0498                 | [C <sub>5</sub> H <sub>6</sub> N] <sup>+</sup>                         | 80.0495                | 3.7 ppm |
| b | 94.0655                 | [C <sub>6</sub> H <sub>6</sub> N] <sup>+</sup>                         | 94.0655                | 0.0 ppm |
| c | 96.0812                 | [C <sub>6</sub> H <sub>10</sub> N] <sup>+</sup>                        | 96.0808                | 4.2 ppm |
| d | 111.0921                | [C <sub>6</sub> H <sub>11</sub> N <sub>2</sub> ] <sup>+</sup>          | 111.0917               | 3.6 ppm |
| e | 113.1078                | [C <sub>6</sub> H <sub>13</sub> N <sub>2</sub> ] <sup>+</sup>          | 113.1073               | 4.4 ppm |
| f | 133.0742                | [C <sub>6</sub> H <sub>10</sub> N <sub>2</sub> Na] <sup>+</sup>        | 133.0736               | 4.5 ppm |
| g | 135.0899                | [C <sub>6</sub> H <sub>12</sub> N <sub>2</sub> Na] <sup>+</sup>        | 135.0893               | 4.4 ppm |
| h | 194.9653                | [Pt] <sup>+</sup>                                                      | 194.9642               | 5.6 ppm |
| i | 306.0582                | [oxaliPt-C <sub>2</sub> H <sub>4</sub> O <sub>4</sub> +H] <sup>+</sup> | 306.0564               | 5.9 ppm |
| j | 354.0794                | [oxaliPt-CO <sub>2</sub> +H] <sup>+</sup>                              | 354.0776               | 5.1 ppm |
| k | 398.0695                | [oxaliPt+H] <sup>+</sup>                                               | 398.0674               | 5.3 ppm |
| l | 420.0514                | [oxaliPt+Na] <sup>+</sup>                                              | 420.0494               | 4.8 ppm |
| m | 436.0252                | [oxaliPt+K] <sup>+</sup>                                               | 436.0233               | 4.4 ppm |

**Table S4.** Full scan mass spectrum of titanocene dichloride ( $\text{Cp}_2\text{TiCl}_2$ ) in 50/50  $\text{H}_2\text{O}/\text{MeCN}$  +1% FA (100% = 2.33E7).

20181031\_Cp2TiCl2\_pos\_2 #1-4 RT: 0.01-0.10 AV: 4 NL: 2.33E7  
T: FTMS + p NSI Full ms [50.00-500.00]

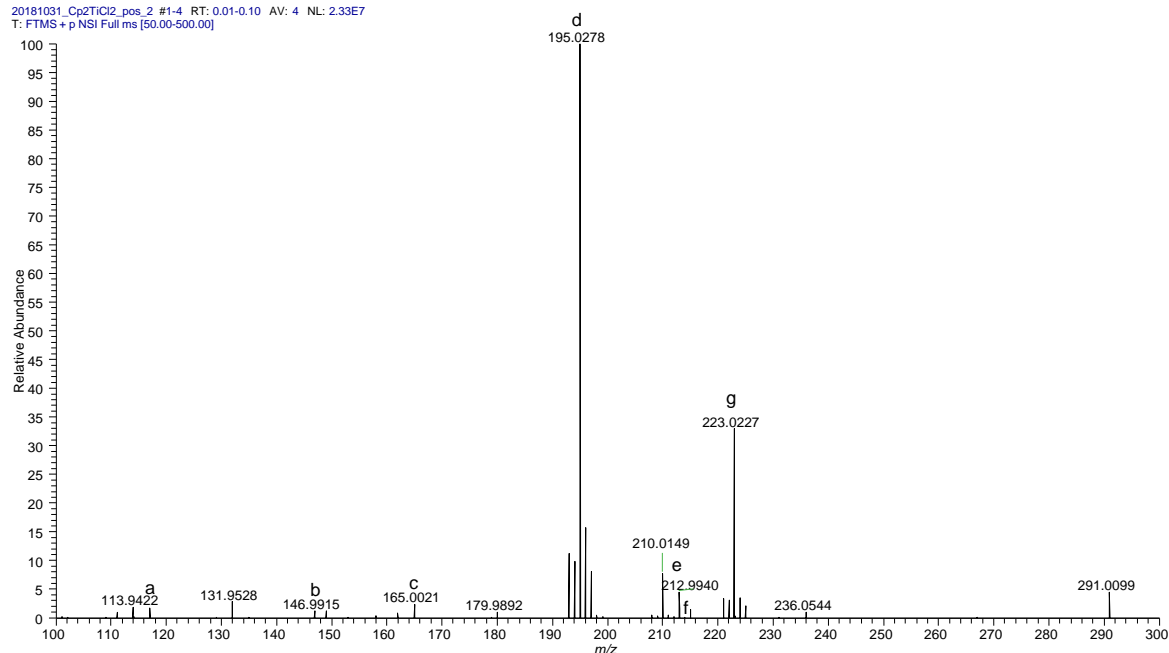

|   | <i>m/z</i> experimental | Name                                                       | <i>m/z</i> calculation | Error    |
|---|-------------------------|------------------------------------------------------------|------------------------|----------|
| a | 116.9657                | $[\text{Ti}(\text{OH})_3+(\text{H}_2\text{O})]^+$          | 116.9662               | -4.3 ppm |
| b | 146.9915                | $[\text{CpTi}(\text{OH})_2]^+$                             | 146.9920               | -3.4 ppm |
| c | 165.0021                | $[\text{CpTi}(\text{OH})_2+(\text{H}_2\text{O})]^+$        | 165.0026               | -3.0 ppm |
| d | 195.0278                | $[\text{Cp}_2\text{Ti}(\text{OH})]^+$                      | 195.0284               | -3.1 ppm |
| e | 212.9940                | $[\text{Cp}_2\text{TiCl}]^+$                               | 212.9945               | -2.3 ppm |
| f | 213.0384                | $[\text{Cp}_2\text{Ti}(\text{OH})+(\text{H}_2\text{O})]^+$ | 213.0390               | -2.7 ppm |
| g | 223.0227                | $[\text{Cp}_2\text{Ti}(\text{COOH})]^+$                    | 223.0233               | -2.7 ppm |

**Table S5.** Full scan mass spectrum of titanocene dichloride (Cp<sub>2</sub>TiCl<sub>2</sub>) in MeOH (100% = 7.30E5).

20210824\_Cp2TiCl2\_MeOH\_pos\_3\_#93-98 RT: 3.14-3.29 AV: 6 NL: 7.30E5  
T: FTMS + p NSI Full ms [50.00-500.00]

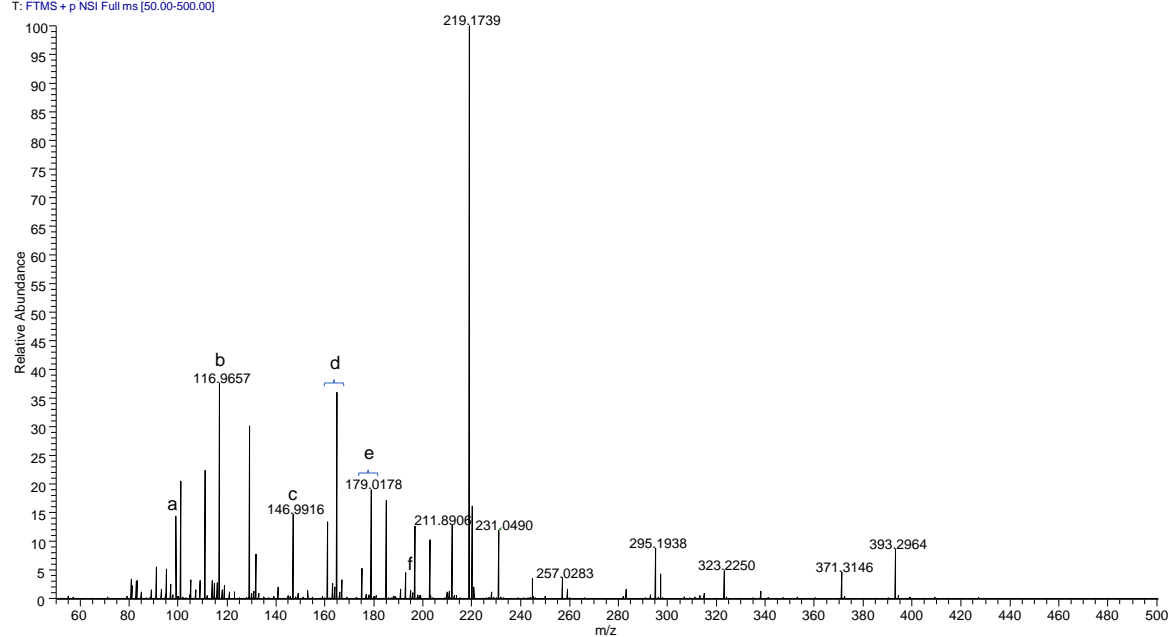

|   | <i>m/z</i> experimental | Name                                                         | <i>m/z</i> calculation | Error    |
|---|-------------------------|--------------------------------------------------------------|------------------------|----------|
| a | 98.9552                 | [Ti(OH) <sub>3</sub> ] <sup>+</sup>                          | 98.9556                | -4.0 ppm |
| b | 116.9657                | [Ti(OH) <sub>3</sub> +(H <sub>2</sub> O)] <sup>+</sup>       | 116.9662               | -4.3 ppm |
| c | 146.9916                | [CpTi(OH) <sub>2</sub> ] <sup>+</sup>                        | 146.9920               | -2.7 ppm |
| d | 161.0073                | [CpTi(OH)(OCH <sub>3</sub> )] <sup>+</sup>                   | 161.0077               | -2.5 ppm |
|   | 165.0022                | [CpTi(OH) <sub>2</sub> +(H <sub>2</sub> O)] <sup>+</sup>     | 165.0026               | -2.4 ppm |
| e | 175.0229                | [CpTi(OCH <sub>3</sub> ) <sub>2</sub> ] <sup>+</sup>         | 175.0233               | -2.3 ppm |
|   | 179.0178                | [CpTi(OH)(OCH <sub>3</sub> )(H <sub>2</sub> O)] <sup>+</sup> | 179.0182               | -2.2 ppm |
| f | 193.0334                | [CpTi(OH)(OCH <sub>3</sub> ) <sub>2</sub> +H] <sup>+</sup>   | 193.0339               | -2.6 ppm |

**Table S6.** Full scan mass spectrum of the  $\beta$ -cyclodextrin/phenylalanine mixture in 50/50 H<sub>2</sub>O/MeCN (100% = 2.75E7).

20190319\_Phe\_b-CD\_pos #2-35 RT: 0.04-0.94 AV: 34 NL: 2.75E7  
T: FTMS + p NSI Full ms [150.00-2000.00]

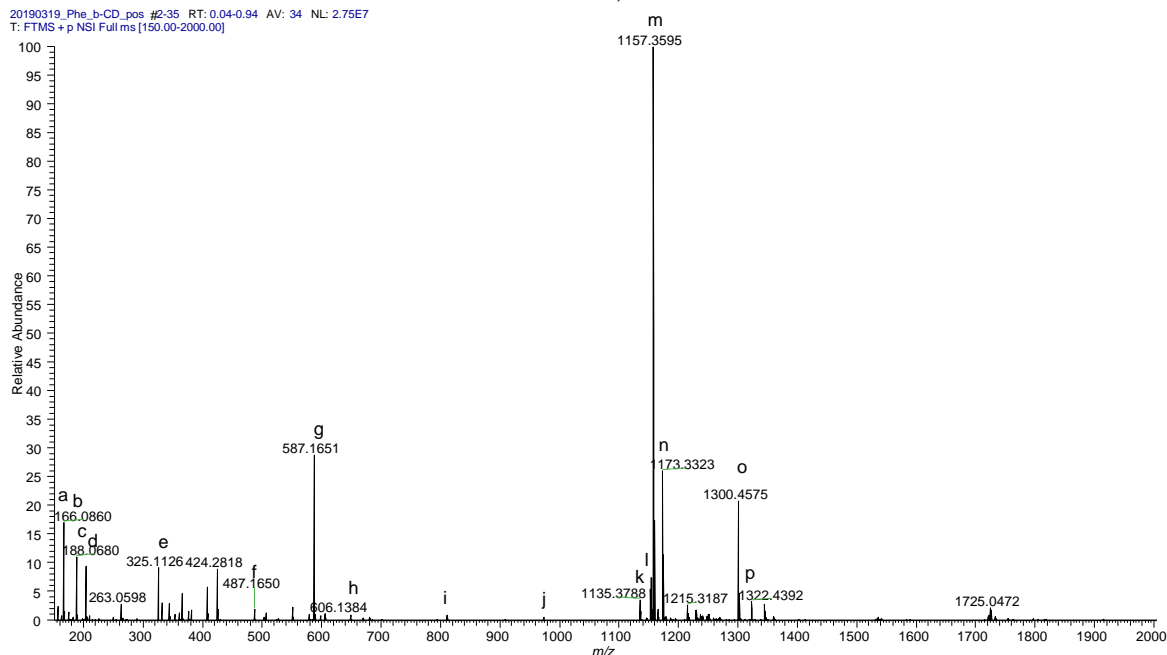

|   | <i>m/z</i> experimental | Name                                        | <i>m/z</i> calculation | Error    |
|---|-------------------------|---------------------------------------------|------------------------|----------|
| a | 163.0599                | [glc <sub>1</sub> +H] <sup>+</sup>          | 163.0601               | -1.2 ppm |
| b | 166.0860                | [Phe+H] <sup>+</sup>                        | 166.0863               | -1.8 ppm |
| c | 188.0680                | [Phe+Na] <sup>+</sup>                       | 188.0682               | -1.1 ppm |
| d | 204.0420                | [Phe+K] <sup>+</sup>                        | 204.0421               | -0.5 ppm |
| e | 325.1126                | [glc <sub>2</sub> +H] <sup>+</sup>          | 325.1129               | -0.9 ppm |
| f | 487.1650                | [glc <sub>3</sub> +H] <sup>+</sup>          | 487.1657               | -1.4 ppm |
| g | 587.1651                | [ $\beta$ CD+Ca] <sup>2+</sup>              | 587.1656               | -1.0 ppm |
| h | 649.2180                | [glc <sub>4</sub> +H] <sup>+</sup>          | 649.2186               | -0.9 ppm |
| i | 811.2713                | [glc <sub>5</sub> +H] <sup>+</sup>          | 811.2714               | -0.1 ppm |
| j | 973.3247                | [glc <sub>6</sub> +H] <sup>+</sup>          | 973.3242               | 0.5 ppm  |
| k | 1135.3788               | [ $\beta$ CD+H] <sup>+</sup>                | 1135.3770              | 1.6 ppm  |
| l | 1152.4054               | [ $\beta$ CD+NH <sub>4</sub> ] <sup>+</sup> | 1152.4036              | 1.6 ppm  |
| m | 1157.3595               | [ $\beta$ CD+Na] <sup>+</sup>               | 1157.3590              | 0.4 ppm  |
| n | 1173.3323               | [ $\beta$ CD+K] <sup>+</sup>                | 1173.3329              | -0.5 ppm |
| o | 1300.4575               | [ $\beta$ CD+Phe+H] <sup>+</sup>            | 1300.4560              | 1.2 ppm  |
| p | 1322.4392               | [ $\beta$ CD+Phe+Na] <sup>+</sup>           | 1322.4380              | 0.9 ppm  |

**Table S7.** Tandem mass spectrum of the  $\beta$ -cyclodextrin/phenylalanine mixture in 50/50 H<sub>2</sub>O/MeCN. Precursor ion:  $m/z$  1300.48, HCD at 16% NCE (37 eV), 100% = 9.23E5.

20190724\_b-CD\_Phe\_pos #160-163 RT: 4.82-4.91 AV: 4 NL: 9.23E5  
T: FTMS+p NSI Full ms2 1300.48@hcd16.00[100.00-2000.00]

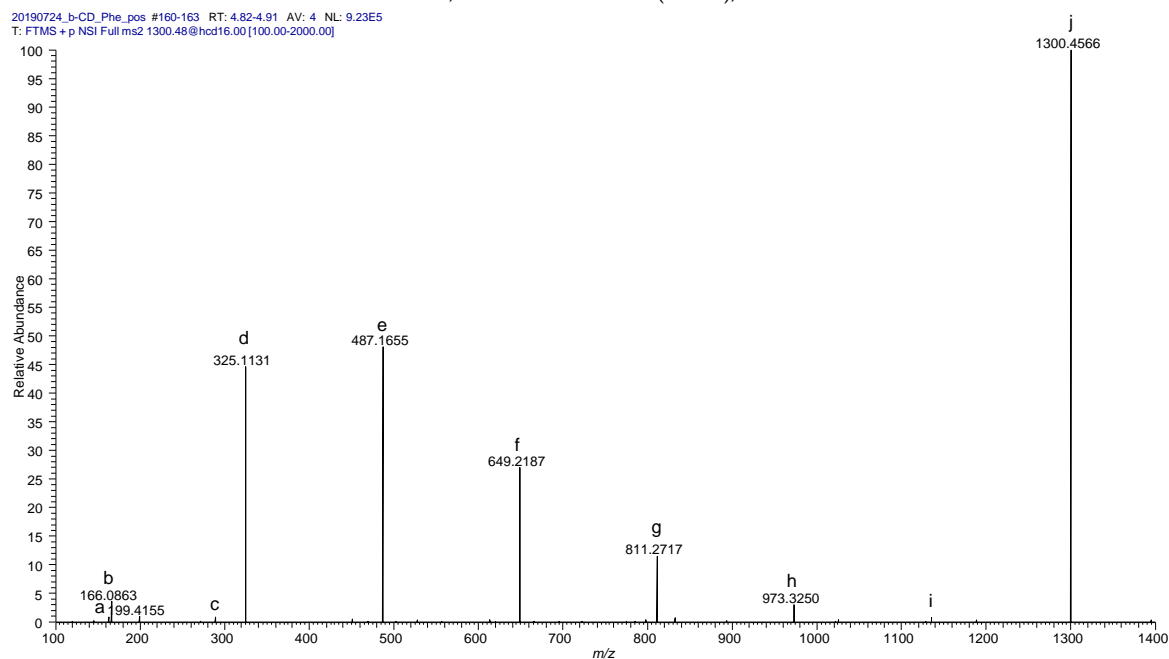

|   | $m/z$ experimental | Name                                                 | $m/z$ calculation | Error    |
|---|--------------------|------------------------------------------------------|-------------------|----------|
| a | 163.0601           | [glc+H] <sup>+</sup>                                 | 163.0601          | 0.0 ppm  |
| b | 166.0863           | [Phe+H] <sup>+</sup>                                 | 166.0863          | 0.0 ppm  |
| c | 289.0920           | [glc <sub>2</sub> -2H <sub>2</sub> O+H] <sup>+</sup> | 289.0918          | 0.7 ppm  |
| d | 325.1131           | [glc <sub>2</sub> +H] <sup>+</sup>                   | 325.1129          | 0.6 ppm  |
| e | 487.1655           | [glc <sub>3</sub> +H] <sup>+</sup>                   | 487.1657          | -0.4 ppm |
| f | 649.2187           | [glc <sub>4</sub> +H] <sup>+</sup>                   | 649.2186          | 0.2 ppm  |
| g | 811.2717           | [glc <sub>5</sub> +H] <sup>+</sup>                   | 811.2714          | 0.4 ppm  |
| h | 973.3250           | [glc <sub>6</sub> +H] <sup>+</sup>                   | 973.3242          | 0.8 ppm  |
| i | 1135.3777          | [ $\beta$ CD+H] <sup>+</sup>                         | 1135.3770         | 0.6 ppm  |
| j | 1300.4566          | [ $\beta$ CD+Phe+H] <sup>+</sup>                     | 1300.4560         | 0.5 ppm  |



**Table S8.** Full scan mass spectrum of the  $\beta$ -cyclodextrin/oxaliplatin mixture in 50/50 H<sub>2</sub>O/MeCN (100% = 7.97E6).

20190612\_oxaliPt\_b-CD\_pos\_2\_#5-77 RT: 0.12-2.13 AV: 73 NL: 7.97E6  
T: FTMS + p NSI Full ms [100.00-2000.00]

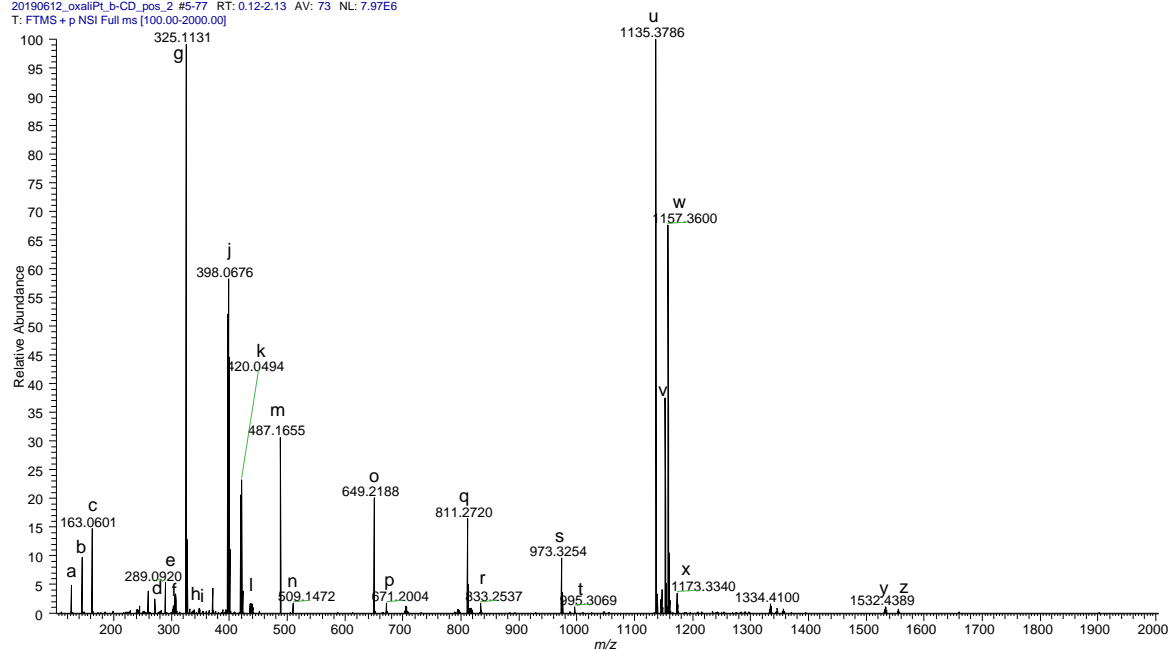

|   | <i>m/z</i> experimental | Name                                                                   | <i>m/z</i> calculation | Error    |
|---|-------------------------|------------------------------------------------------------------------|------------------------|----------|
| a | 127.0389                | [glc-2H <sub>2</sub> O+H] <sup>+</sup>                                 | 127.0390               | -0.8 ppm |
| b | 145.0495                | [glc-H <sub>2</sub> O+H] <sup>+</sup>                                  | 145.0495               | 0.0 ppm  |
| c | 163.0601                | [glc+H] <sup>+</sup>                                                   | 163.0601               | 0.0 ppm  |
| d | 271.0814                | [glc <sub>2</sub> -3H <sub>2</sub> O+H] <sup>+</sup>                   | 271.0812               | 0.7 ppm  |
| e | 289.0920                | [glc <sub>2</sub> -2H <sub>2</sub> O+H] <sup>+</sup>                   | 289.0918               | 0.7 ppm  |
| f | 306.0568                | [oxaliPt-C <sub>2</sub> H <sub>4</sub> O <sub>4</sub> +H] <sup>+</sup> | 306.0564               | 1.3 ppm  |
| g | 325.1131                | [glc <sub>2</sub> +H] <sup>+</sup>                                     | 325.1129               | 0.6 ppm  |
| h | 347.0948                | [glc <sub>2</sub> +Na] <sup>+</sup>                                    | 347.0949               | -0.3 ppm |
| i | 354.0777                | [oxaliPt-CO <sub>2</sub> +H] <sup>+</sup>                              | 354.0776               | 0.3 ppm  |
| j | 398.0676                | [oxaliPt+H] <sup>+</sup>                                               | 398.0674               | 0.5 ppm  |
| k | 420.0494                | [oxaliPt+Na] <sup>+</sup>                                              | 420.0494               | 0.0 ppm  |
| l | 436.0232                | [oxaliPt+K] <sup>+</sup>                                               | 436.0233               | -0.2 ppm |
| m | 487.1655                | [glc <sub>3</sub> +H] <sup>+</sup>                                     | 487.1657               | -0.4 ppm |
| n | 509.1472                | [glc <sub>3</sub> +Na] <sup>+</sup>                                    | 509.1477               | -1.0 ppm |
| o | 649.2188                | [glc <sub>4</sub> +H] <sup>+</sup>                                     | 649.2186               | 0.3 ppm  |
| p | 671.2004                | [glc <sub>4</sub> +Na] <sup>+</sup>                                    | 671.2005               | -0.1 ppm |
| q | 811.2720                | [glc <sub>5</sub> +H] <sup>+</sup>                                     | 811.2714               | 0.7 ppm  |
| r | 833.2537                | [glc <sub>5</sub> +Na] <sup>+</sup>                                    | 833.2533               | 0.5 ppm  |
| s | 973.3254                | [glc <sub>6</sub> +H] <sup>+</sup>                                     | 973.3242               | 1.2 ppm  |
| t | 995.3069                | [glc <sub>6</sub> +Na] <sup>+</sup>                                    | 995.3062               | 0.7 ppm  |
| u | 1135.3786               | [ $\beta$ CD+H] <sup>+</sup>                                           | 1135.3770              | 1.4 ppm  |
| v | 1152.4052               | [ $\beta$ CD+NH <sub>4</sub> ] <sup>+</sup>                            | 1152.4036              | 1.4 ppm  |
| w | 1157.3600               | [ $\beta$ CD+Na] <sup>+</sup>                                          | 1157.3590              | 0.9 ppm  |
| x | 1173.3340               | [ $\beta$ CD+K] <sup>+</sup>                                           | 1173.3329              | 0.9 ppm  |
| y | 1532.4389               | [ $\beta$ CD+oxaliPt+H] <sup>+</sup>                                   | 1532.4372              | 1.1 ppm  |
| z | 1554.4207               | [ $\beta$ CD+oxaliPt+Na] <sup>+</sup>                                  | 1554.4191              | 1.0 ppm  |

**Table S9.** Tandem mass spectrum of the  $\beta$ -cyclodextrin/oxaliplatin mixture in 50/50 H<sub>2</sub>O/MeCN. Precursor ion:  $m/z$  1532.50, HCD at 14% NCE (38 eV), 100% = 1.64E5.

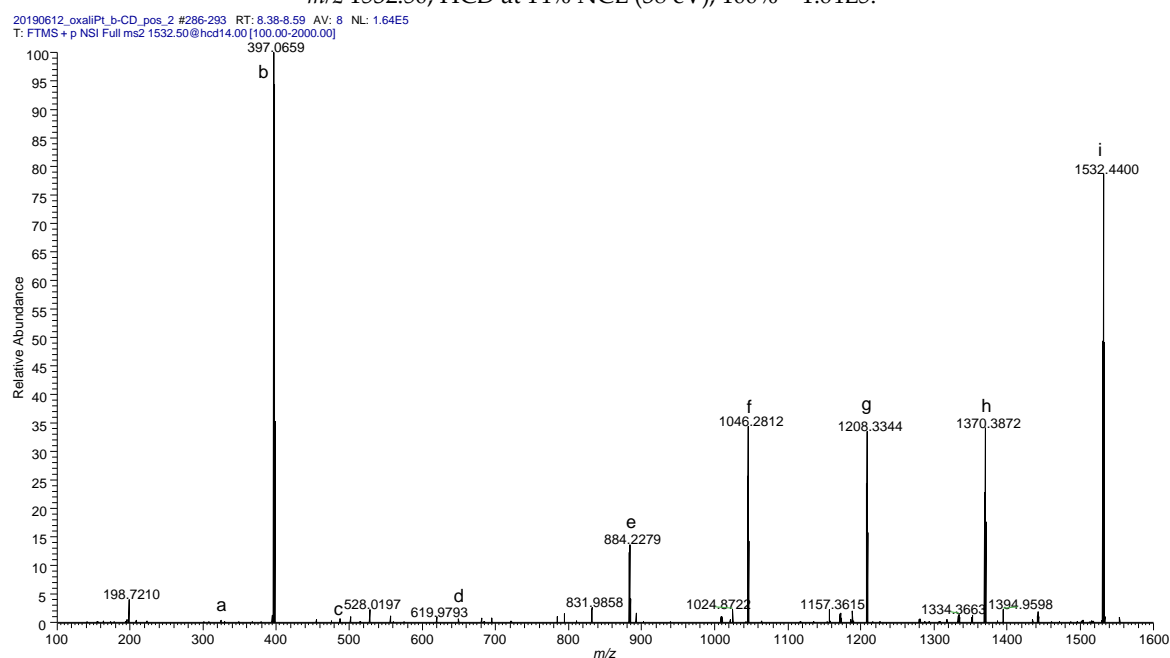

|   | $m/z$ experimental | Name                                       | $m/z$ calculation | Error   |
|---|--------------------|--------------------------------------------|-------------------|---------|
| a | 325.1134           | [glc <sub>2</sub> +H] <sup>+</sup>         | 325.1129          | 1.5 ppm |
| b | 398.0681           | [oxaliPt+H] <sup>+</sup>                   | 398.0674          | 1.8 ppm |
| c | 487.1661           | [glc <sub>3</sub> +H] <sup>+</sup>         | 487.1657          | 0.8 ppm |
| d | 649.2195           | [glc <sub>4</sub> +H] <sup>+</sup>         | 649.2186          | 1.4 ppm |
| e | 884.2279           | [glc <sub>3</sub> +oxaliPt+H] <sup>+</sup> | 884.2259          | 2.3 ppm |
| f | 1046.2812          | [glc <sub>4</sub> +oxaliPt+H] <sup>+</sup> | 1046.2787         | 2.4 ppm |
| g | 1208.3344          | [glc <sub>5</sub> +oxaliPt+H] <sup>+</sup> | 1208.3315         | 2.4 ppm |
| h | 1370.3872          | [glc <sub>6</sub> +oxaliPt+H] <sup>+</sup> | 1370.3843         | 2.1 ppm |
| i | 1532.4400          | [ $\beta$ CD+oxaliPt+H] <sup>+</sup>       | 1532.4372         | 1.8 ppm |

**Table S10.** Full scan mass spectrum of the  $\beta$ -cyclodextrin/titanocene dichloride mixture in 50/50 H<sub>2</sub>O/MeCN (100% = 2.19E7).

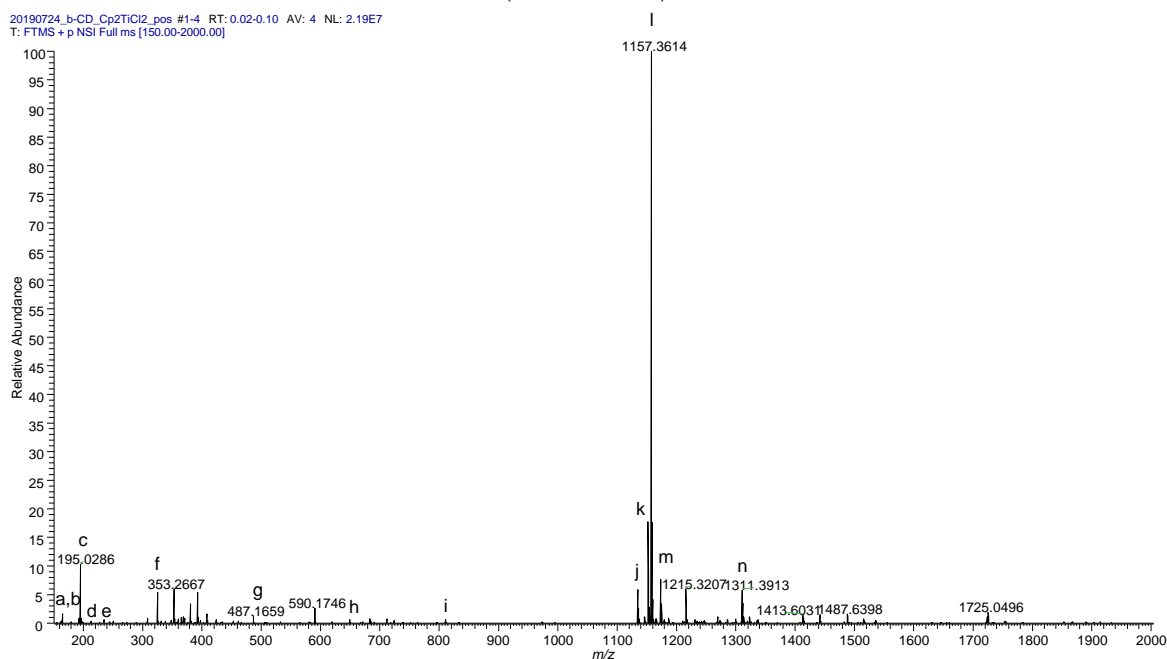

|   | <i>m/z</i> experimental | Name                                                     | <i>m/z</i> calculation | Error   |
|---|-------------------------|----------------------------------------------------------|------------------------|---------|
| a | 163.0603                | [glc+H] <sup>+</sup>                                     | 163.0601               | 1.2 ppm |
| b | 165.0027                | [CpTi(OH) <sub>2</sub> +(H <sub>2</sub> O)] <sup>+</sup> | 165.0026               | 0.6 ppm |
| c | 195.0286                | [Cp <sub>2</sub> Ti(OH)] <sup>+</sup>                    | 195.0284               | 1.0 ppm |
| d | 213.0392                | [Cp <sub>2</sub> Ti(OH)+(H <sub>2</sub> O)] <sup>+</sup> | 213.0390               | 0.9 ppm |
| e | 235.0213                | [Cp <sub>2</sub> Ti(OH) <sub>2</sub> +Na] <sup>+</sup>   | 235.0209               | 1.7 ppm |
| f | 325.1134                | [glc <sub>2</sub> +H] <sup>+</sup>                       | 325.1129               | 1.5 ppm |
| g | 487.1659                | [glc <sub>3</sub> +H] <sup>+</sup>                       | 487.1657               | 0.4 ppm |
| h | 649.2191                | [glc <sub>4</sub> +H] <sup>+</sup>                       | 649.2186               | 0.8 ppm |
| i | 811.2728                | [glc <sub>5</sub> +H] <sup>+</sup>                       | 811.2714               | 1.7 ppm |
| j | 1135.3807               | [βCD+H] <sup>+</sup>                                     | 1135.3770              | 3.3 ppm |
| k | 1152.4073               | [βCD+NH <sub>4</sub> ] <sup>+</sup>                      | 1152.4036              | 3.2 ppm |
| l | 1157.3614               | [βCD+Na] <sup>+</sup>                                    | 1157.3590              | 2.1 ppm |
| m | 1173.3357               | [βCD+K] <sup>+</sup>                                     | 1173.3329              | 2.4 ppm |
| n | 1311.3913               | [βCD+Cp <sub>2</sub> Ti-H] <sup>+</sup>                  | 1311.3876              | 2.8 ppm |

**Table S11.** Tandem mass spectrum of the  $\beta$ -cyclodextrin/titanocene dichloride mixture in 50/50 H<sub>2</sub>O/MeCN.  
Precursor ion:  $[\beta\text{CD}+\text{Cp}_2\text{Ti-H}]^+$   $m/z$  1311.40, HCD at 20% NCE (47 eV), 100% = 8.82E5.

20210325\_bCD\_Cp2TiCl2\_pos\_2 #331-333 RT: 10.00-10.06 AV: 3 NL: 8.82E5  
T: FTMS + p NSI Full ms2 1311.40@hcd20.00 [100.00-2000.00]

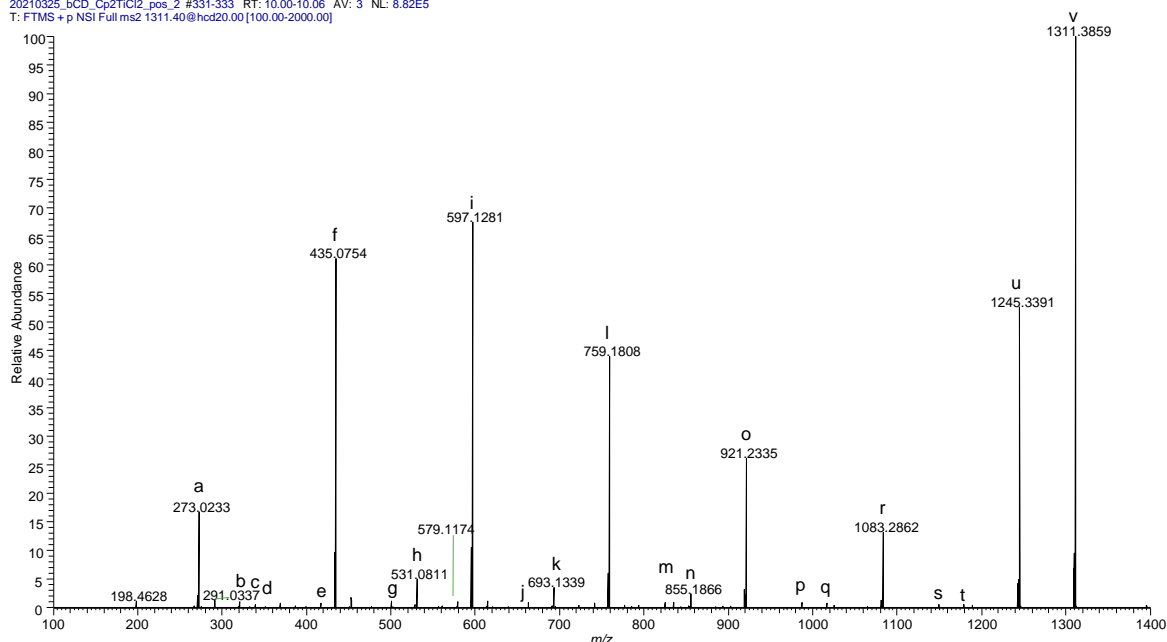

|   | <i>m/z</i> experimental | Name                                                 | <i>m/z</i> calculation | Error    |
|---|-------------------------|------------------------------------------------------|------------------------|----------|
| a | 273.0233                | $[\text{glc}_1+\text{CpTi-2H}]^+$                    | 273.0237               | -1.5 ppm |
| b | 321.0594                | $[\text{glc-H}_2\text{O}+\text{Cp}_2\text{Ti-H}]^+$  | 321.0601               | -2.2 ppm |
| c | 339.0699                | $[\text{glc}_1+\text{Cp}_2\text{Ti-H}]^+$            | 339.0706               | -2.1 ppm |
| d | 369.0287                | $[\text{glc}_2+\text{Ti-3H}]^+$                      | 369.0296               | -2.4 ppm |
| e | 417.0649                | $[\text{glc}_2-\text{H}_2\text{O}+\text{CpTi-2H}]^+$ | 417.0660               | -2.6 ppm |
| f | 435.0754                | $[\text{glc}_2+\text{CpTi-2H}]^+$                    | 435.0765               | -2.5 ppm |
| g | 501.1221                | $[\text{glc}_2+\text{Cp}_2\text{Ti-H}]^+$            | 501.1235               | -2.8 ppm |
| h | 531.0811                | $[\text{glc}_3+\text{Ti-3H}]^+$                      | 531.0824               | -2.4 ppm |
| i | 597.1281                | $[\text{glc}_3+\text{CpTi-2H}]^+$                    | 597.1293               | -2.0 ppm |
| j | 663.1747                | $[\text{glc}_3+\text{Cp}_2\text{Ti-H}]^+$            | 663.1763               | -2.4 ppm |
| k | 693.1339                | $[\text{glc}_4+\text{Ti-3H}]^+$                      | 693.1352               | -1.9 ppm |
| l | 759.1808                | $[\text{glc}_4+\text{CpTi-2H}]^+$                    | 759.1822               | -1.8 ppm |
| m | 825.2277                | $[\text{glc}_4+\text{Cp}_2\text{Ti-H}]^+$            | 825.2291               | -1.7 ppm |
| n | 855.1866                | $[\text{glc}_5+\text{Ti-3H}]^+$                      | 855.1880               | -1.6 ppm |
| o | 921.2335                | $[\text{glc}_5+\text{CpTi-2H}]^+$                    | 921.2350               | -1.6 ppm |
| p | 987.2802                | $[\text{glc}_5+\text{Cp}_2\text{Ti-H}]^+$            | 987.2819               | -1.7 ppm |
| q | 1017.2391               | $[\text{glc}_6+\text{Ti-3H}]^+$                      | 1017.2409              | -1.8 ppm |
| r | 1083.2862               | $[\text{glc}_6+\text{CpTi-2H}]^+$                    | 1083.2878              | -1.5 ppm |
| s | 1149.3330               | $[\text{glc}_6+\text{Cp}_2\text{Ti-H}]^+$            | 1149.3348              | -1.6 ppm |
| t | 1179.2922               | $[\beta\text{CD}+\text{Ti-3H}]^+$                    | 1179.2937              | -1.3 ppm |
| u | 1245.3391               | $[\beta\text{CD}+\text{CpTi-2H}]^+$                  | 1245.3406              | -1.2 ppm |
| v | 1311.3859               | $[\beta\text{CD}+\text{Cp}_2\text{Ti-H}]^+$          | 1311.3876              | -1.3 ppm |

**Table S12.** Full scan mass spectrum of the sucrose/titanocene dichloride mixture in 50/50 H<sub>2</sub>O/MeCN (100% = 3.67E7).

20210826\_sucrose\_Cp2TiCl2\_pos\_3 #16-17 RT: 0.43-0.46 AV: 2 NL: 3.67E7  
T: FTMS + p NSI Full ms [100.00-1500.00]

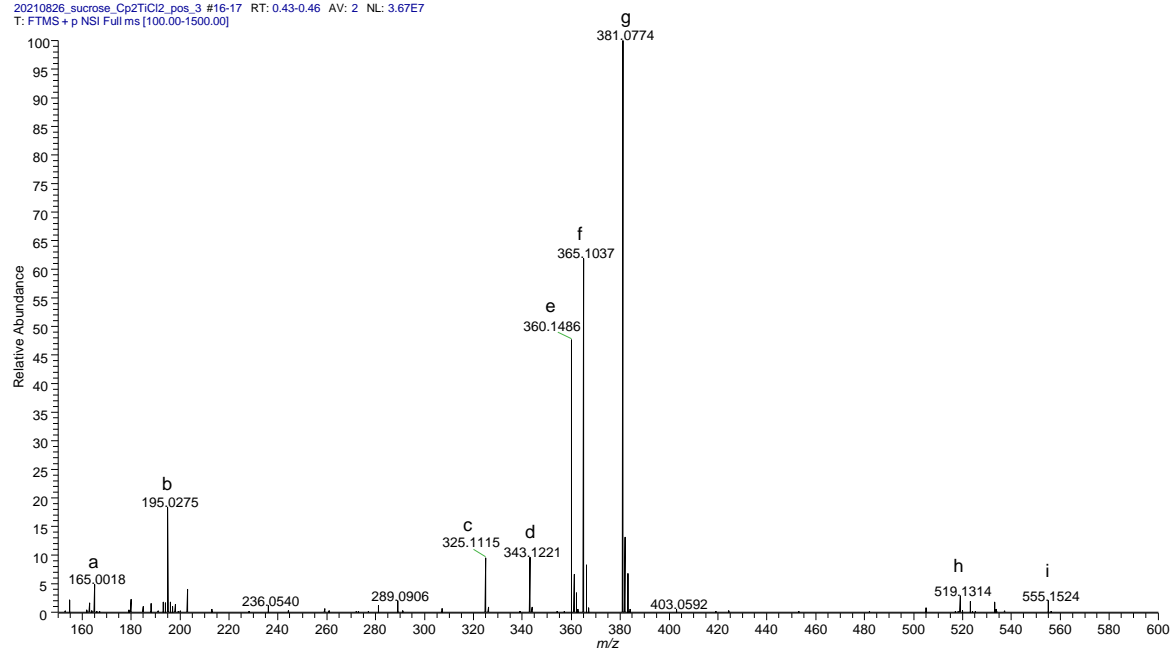

|   | <i>m/z</i> experimental | Name                                                        | <i>m/z</i> calculation | Error    |
|---|-------------------------|-------------------------------------------------------------|------------------------|----------|
| a | 165.0018                | [CpTi(OH) <sub>2</sub> (H <sub>2</sub> O)] <sup>+</sup>     | 165.0026               | -4.8 ppm |
| b | 195.0275                | [Cp <sub>2</sub> Ti(OH)] <sup>+</sup>                       | 195.0284               | -4.5 ppm |
| c | 325.1115                | [suc-H <sub>2</sub> O+H] <sup>+</sup>                       | 325.1129               | -4.2 ppm |
| d | 343.1221                | [suc+H] <sup>+</sup>                                        | 343.1235               | -4.2 ppm |
| e | 360.1486                | [suc+NH <sub>4</sub> ] <sup>+</sup>                         | 360.1500               | -4.0 ppm |
| f | 365.1037                | [suc+Na] <sup>+</sup>                                       | 365.1054               | -4.8 ppm |
| g | 381.0774                | [suc+K] <sup>+</sup>                                        | 381.0794               | -5.2 ppm |
| h | 519.1314                | [suc+Cp <sub>2</sub> Ti-H] <sup>+</sup>                     | 519.1340               | -5.1 ppm |
| i | 555.1524                | [suc+Cp <sub>2</sub> Ti(OH)(H <sub>2</sub> O)] <sup>+</sup> | 555.1552               | -5.0 ppm |

**Table S13.** Tandem mass spectrum of the sucrose/titanocene dichloride mixture in 50/50 H<sub>2</sub>O/MeCN. Precursor ion: [suc+Cp<sub>2</sub>Ti-H]<sup>+</sup> *m/z* 519.20, HCD at 19% NCE (17 eV), 100% = 2.17E5.

20210826\_sucrose\_Cp2TiCl2\_pos\_3 #72-79 RT: 2.47-2.73 AV: 8 NL: 2.17E5  
T: FTMS + p NSI Full ms2 519.20@hcd19.00 [100.00-1000.00]

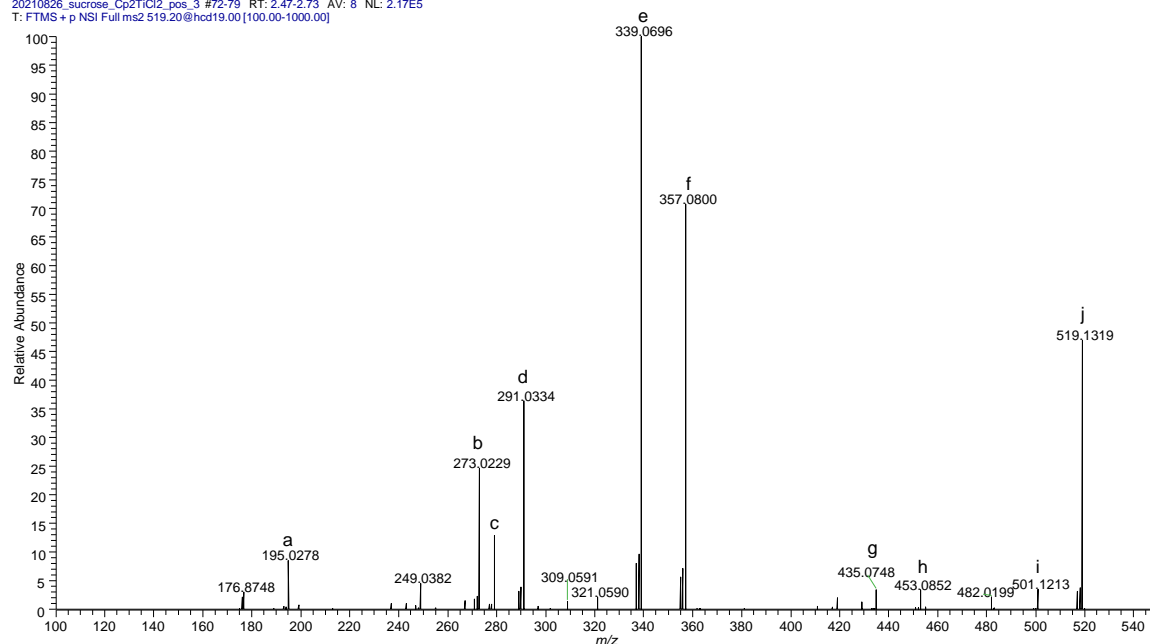

|   | <i>m/z</i> experimental | Name                                                                               | <i>m/z</i> calculation | Error    |
|---|-------------------------|------------------------------------------------------------------------------------|------------------------|----------|
| a | 195.0278                | [Cp <sub>2</sub> Ti(OH)] <sup>+</sup>                                              | 195.0284               | -3.1 ppm |
| b | 273.0229                | [C <sub>11</sub> H <sub>13</sub> O <sub>5</sub> Ti] <sup>+</sup>                   | 273.0237               | -2.9 ppm |
| c | 279.0487                | [C <sub>14</sub> H <sub>15</sub> O <sub>3</sub> Ti] <sup>+</sup>                   | 279.0495               | -3.0 ppm |
| d | 291.0334                | [C <sub>11</sub> H <sub>15</sub> O <sub>6</sub> Ti] <sup>+</sup>                   | 291.0343               | -3.0 ppm |
| e | 339.0696                | [C <sub>6</sub> H <sub>10</sub> O <sub>5</sub> +Cp <sub>2</sub> Ti-H] <sup>+</sup> | 339.0706               | -3.2 ppm |
| f | 357.0800                | [C <sub>6</sub> H <sub>12</sub> O <sub>6</sub> +Cp <sub>2</sub> Ti-H] <sup>+</sup> | 357.0812               | -3.4 ppm |
| g | 435.0748                | [suc-H <sub>2</sub> O+CpTi-2H] <sup>+</sup>                                        | 435.0765               | -3.9 ppm |
| h | 453.0852                | [suc+CpTi-2H] <sup>+</sup>                                                         | 453.0871               | -4.2 ppm |
| i | 501.1213                | [suc-H <sub>2</sub> O+Cp <sub>2</sub> Ti-H] <sup>+</sup>                           | 501.1235               | -4.4 ppm |
| j | 519.1319                | [suc+Cp <sub>2</sub> Ti-H] <sup>+</sup>                                            | 519.1340               | -4.1 ppm |

**Table S14.** Full scan mass spectrum of the maltose/titanocene dichloride mixture in 50/50 H<sub>2</sub>O/MeCN (100% = 1.06E7).

20210830\_maltose\_Cp2TiCl2\_pos #9-20 RT: 0.26-0.57 AV: 12 NL: 1.06E7  
T: FTMS + p NSI Full ms [100.00-1000.00]

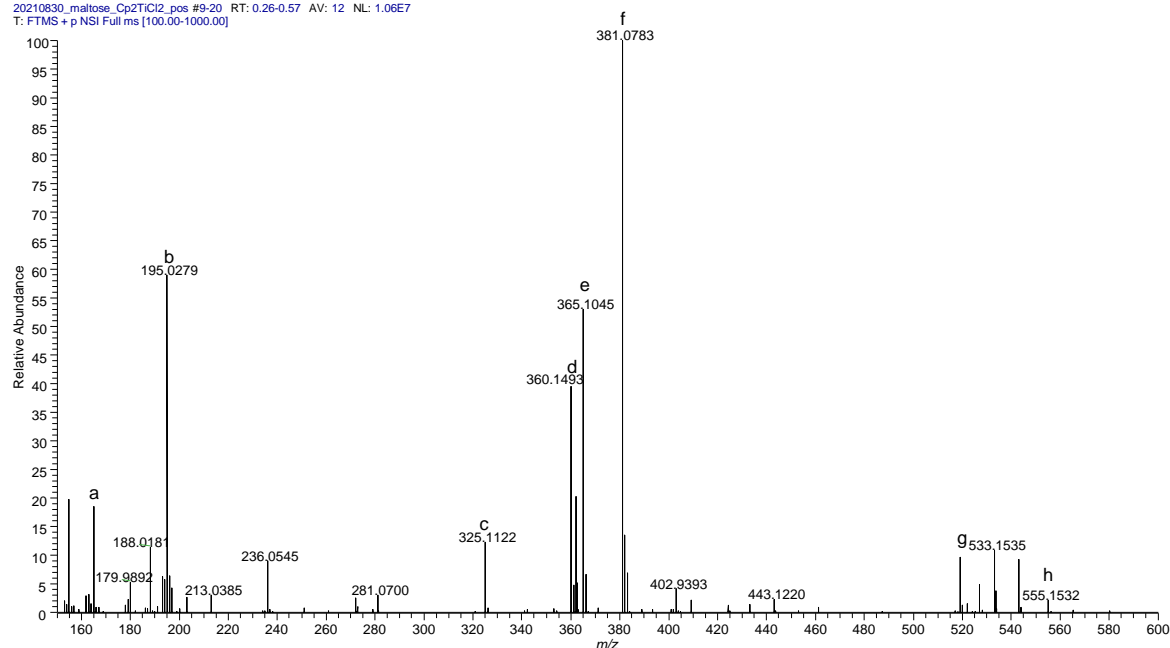

|   | <i>m/z</i> experimental | Name                                                            | <i>m/z</i> calculation | Error    |
|---|-------------------------|-----------------------------------------------------------------|------------------------|----------|
| a | 165.0021                | [CpTi(OH) <sub>2</sub> (H <sub>2</sub> O)] <sup>+</sup>         | 165.0026               | -2.7 ppm |
| b | 195.0279                | [Cp <sub>2</sub> Ti(OH)] <sup>+</sup>                           | 195.0284               | -2.5 ppm |
| c | 325.1122                | [maltose-H <sub>2</sub> O+H] <sup>+</sup>                       | 325.1129               | -2.3 ppm |
| d | 360.1493                | [maltose+NH <sub>4</sub> ] <sup>+</sup>                         | 360.1500               | -2.0 ppm |
| e | 365.1045                | [maltose+Na] <sup>+</sup>                                       | 365.1054               | -2.6 ppm |
| f | 381.0783                | [maltose+K] <sup>+</sup>                                        | 381.0794               | -2.8 ppm |
| g | 519.1325                | [maltose+Cp <sub>2</sub> Ti-H] <sup>+</sup>                     | 519.1340               | -3.1 ppm |
| h | 555.1532                | [maltose+Cp <sub>2</sub> Ti(OH)(H <sub>2</sub> O)] <sup>+</sup> | 555.1552               | -3.6 ppm |

**Table S15.** Tandem mass spectrum of the maltose/titanocene dichloride mixture in 50/50 H<sub>2</sub>O/MeCN. Precursor ion: [maltose+Cp<sub>2</sub>Ti-H]<sup>+</sup> *m/z* 519.20, HCD at 20% NCE (18 eV), 100% = 2.20E5.

20210830\_maltose\_Cp2TiCl2\_pos #71-74 RT: 2.12-2.21 AV: 4 NL: 2.20E5  
T: FTMS + p NSI Full ms2 519.20@hcd20.00 [100.00-1000.00]

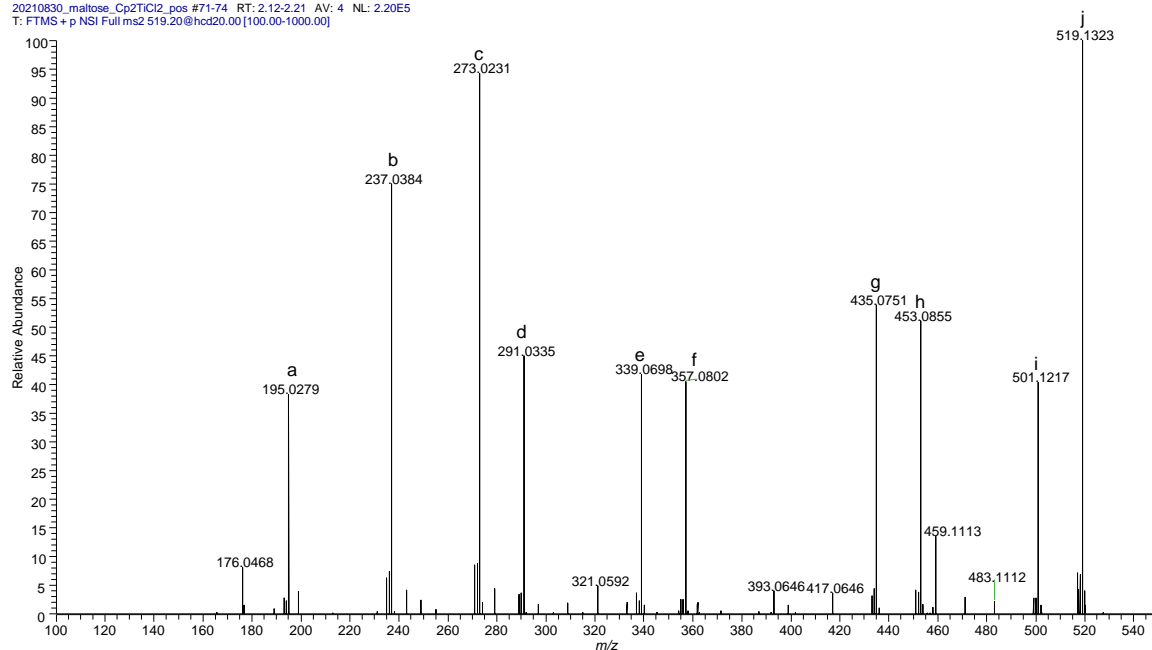

|   | <i>m/z</i> experimental | Name                                                                               | <i>m/z</i> calculation | Error    |
|---|-------------------------|------------------------------------------------------------------------------------|------------------------|----------|
| a | 195.0279                | [Cp <sub>2</sub> Ti(OH)] <sup>+</sup>                                              | 195.0284               | -2.6 ppm |
| b | 237.0384                | [C <sub>12</sub> H <sub>13</sub> O <sub>2</sub> Ti] <sup>+</sup>                   | 237.0390               | -2.4 ppm |
| c | 273.0231                | [C <sub>11</sub> H <sub>13</sub> O <sub>5</sub> Ti] <sup>+</sup>                   | 273.0237               | -2.3 ppm |
| d | 291.0335                | [C <sub>11</sub> H <sub>15</sub> O <sub>6</sub> Ti] <sup>+</sup>                   | 291.0343               | -2.5 ppm |
| e | 339.0698                | [C <sub>6</sub> H <sub>10</sub> O <sub>5</sub> +Cp <sub>2</sub> Ti-H] <sup>+</sup> | 339.0706               | -2.6 ppm |
| f | 357.0802                | [C <sub>6</sub> H <sub>12</sub> O <sub>6</sub> +Cp <sub>2</sub> Ti-H] <sup>+</sup> | 357.0812               | -2.8 ppm |
| g | 435.0751                | [maltose-H <sub>2</sub> O+CpTi-2H] <sup>+</sup>                                    | 435.0765               | -3.2 ppm |
| h | 453.0855                | [maltose+CpTi-2H] <sup>+</sup>                                                     | 453.0871               | -3.4 ppm |
| i | 501.1217                | [maltose-H <sub>2</sub> O+Cp <sub>2</sub> Ti-H] <sup>+</sup>                       | 501.1235               | -3.6 ppm |
| j | 519.1323                | [maltose+Cp <sub>2</sub> Ti-H] <sup>+</sup>                                        | 519.1340               | -3.4 ppm |



**Table S16.** Full scan mass spectrum of DM $\beta$ -cyclodextrin in 50/50 H<sub>2</sub>O/MeCN +1% FA (100% = 2.94E7).

20191024\_DM $\beta$ CD\_FA #104-109 RT: 3.05-3.19 AV: 6 NL: 2.94E7  
T: FTMS + p NSI Full ms [100.00-2000.00]

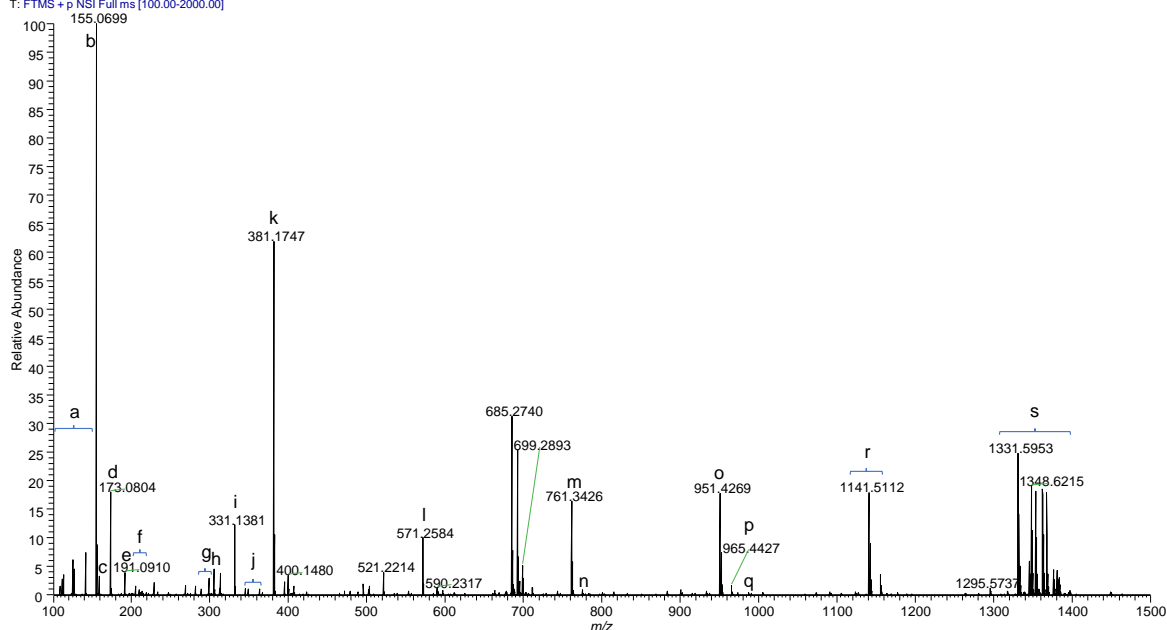

|   | <i>m/z</i> experimental | Name                                                                       | <i>m/z</i> calculation | Error    |
|---|-------------------------|----------------------------------------------------------------------------|------------------------|----------|
| a | 109.0280                | [DMglc-H <sub>2</sub> O-2CH <sub>3</sub> OH+H] <sup>+</sup>                | 109.0284               | -3.7 ppm |
|   | 125.0593                | [DMglc-2H <sub>2</sub> O-CH <sub>2</sub> O+H] <sup>+</sup>                 | 125.0597               | -3.2 ppm |
|   | 127.0386                | [DMglc-2CH <sub>3</sub> OH+H] <sup>+</sup>                                 | 127.0390               | -3.1 ppm |
|   | 141.0543                | [DMglc-H <sub>2</sub> O-CH <sub>3</sub> OH+H] <sup>+</sup>                 | 141.0546               | -2.1 ppm |
| b | 155.0699                | [DMglc-2H <sub>2</sub> O+H] <sup>+</sup>                                   | 155.0703               | -2.6 ppm |
| c | 159.0648                | [DMglc-CH <sub>3</sub> OH+H] <sup>+</sup>                                  | 159.0652               | -2.5 ppm |
| d | 173.0804                | [DMglc-H <sub>2</sub> O+H] <sup>+</sup>                                    | 173.0808               | -2.3 ppm |
| e | 191.0910                | [DMglc+H] <sup>+</sup>                                                     | 191.0914               | -2.1 ppm |
| f | 205.1067                | [DMglc+CH <sub>2</sub> +H] <sup>+</sup>                                    | 205.1071               | -2.0 ppm |
|   | 213.0729                | [DMglc+Na] <sup>+</sup>                                                    | 213.0733               | -1.9 ppm |
| g | 281.1015                | [DMglc <sub>2</sub> -2H <sub>2</sub> O-2CH <sub>3</sub> OH+H] <sup>+</sup> | 281.1020               | -1.8 ppm |
|   | 299.1120                | [DMglc <sub>2</sub> -H <sub>2</sub> O-2CH <sub>3</sub> OH+H] <sup>+</sup>  | 299.1125               | -1.7 ppm |
| h | 313.1276                | [DMglc <sub>2</sub> -2H <sub>2</sub> O-CH <sub>3</sub> OH+H] <sup>+</sup>  | 313.1282               | -1.9 ppm |
| i | 331.1381                | [DMglc <sub>2</sub> -H <sub>2</sub> O-CH <sub>3</sub> OH+H] <sup>+</sup>   | 331.1387               | -1.8 ppm |
| j | 349.1486                | [DMglc <sub>2</sub> -CH <sub>3</sub> OH+H] <sup>+</sup>                    | 349.1493               | -2.0 ppm |
|   | 363.1642                | [DMglc <sub>2</sub> -H <sub>2</sub> O+H] <sup>+</sup>                      | 363.1650               | -2.2 ppm |
| k | 381.1747                | [DMglc <sub>2</sub> +H] <sup>+</sup>                                       | 381.1755               | -2.1 ppm |
| l | 571.2584                | [DMglc <sub>3</sub> +H] <sup>+</sup>                                       | 571.2596               | -2.1 ppm |
| m | 761.3426                | [DMglc <sub>4</sub> +H] <sup>+</sup>                                       | 761.3438               | -1.6 ppm |
| n | 775.3581                | [DMglc <sub>4</sub> +CH <sub>2</sub> +H] <sup>+</sup>                      | 775.3594               | -1.7 ppm |
| o | 951.4269                | [DMglc <sub>5</sub> +H] <sup>+</sup>                                       | 951.4279               | -1.1 ppm |
| p | 965.4427                | [DMglc <sub>5</sub> +CH <sub>2</sub> +H] <sup>+</sup>                      | 965.4435               | -0.8 ppm |
| q | 987.4241                | [DMglc <sub>5</sub> +CH <sub>2</sub> +Na] <sup>+</sup>                     | 987.4255               | -1.4 ppm |
| r | 1127.4951               | [DMglc <sub>6</sub> -CH <sub>2</sub> +H] <sup>+</sup>                      | 1127.4964              | -1.2 ppm |
|   | 1141.5112               | [DMglc <sub>6</sub> +H] <sup>+</sup>                                       | 1141.5120              | -0.7 ppm |
|   | 1144.5199               | [DMglc <sub>6</sub> -CH <sub>2</sub> +NH <sub>4</sub> ] <sup>+</sup>       | 1144.5229              | -2.6 ppm |
|   | 1155.5265               | [DMglc <sub>6</sub> +CH <sub>2</sub> +H] <sup>+</sup>                      | 1155.5277              | -1.0 ppm |
| s | 1317.5796               | [DM $\beta$ CD-CH <sub>2</sub> +H] <sup>+</sup>                            | 1317.5805              | -0.7 ppm |
|   | 1331.5953               | [DM $\beta$ CD+H] <sup>+</sup>                                             | 1331.5961              | -0.6 ppm |
|   | 1334.6044               | [DM $\beta$ CD-CH <sub>2</sub> +NH <sub>4</sub> ] <sup>+</sup>             | 1334.6070              | -1.9 ppm |
|   | 1345.6108               | [DM $\beta$ CD+CH <sub>2</sub> +H] <sup>+</sup>                            | 1345.6112              | -0.3 ppm |

---

|           |                                                                 |           |          |
|-----------|-----------------------------------------------------------------|-----------|----------|
| 1348.6215 | [DM $\beta$ CD+NH <sub>4</sub> ] <sup>+</sup>                   | 1348.6227 | -0.9 ppm |
| 1353.5766 | [DM $\beta$ CD+Na] <sup>+</sup>                                 | 1353.5781 | -1.1 ppm |
| 1359.6260 | [DM $\beta$ CD+2CH <sub>2</sub> +H] <sup>+</sup>                | 1359.6274 | -1.0 ppm |
| 1362.6368 | [DM $\beta$ CD+CH <sub>2</sub> +NH <sub>4</sub> ] <sup>+</sup>  | 1362.6383 | -1.1 ppm |
| 1367.5921 | [DM $\beta$ CD+CH <sub>2</sub> +Na] <sup>+</sup>                | 1367.5937 | -1.2 ppm |
| 1369.5504 | [DM $\beta$ CD+K] <sup>+</sup>                                  | 1369.5520 | -1.2 ppm |
| 1376.6523 | [DM $\beta$ CD+2CH <sub>2</sub> +NH <sub>4</sub> ] <sup>+</sup> | 1376.6540 | -1.2 ppm |
| 1381.6075 | [DM $\beta$ CD+2CH <sub>2</sub> +Na] <sup>+</sup>               | 1381.6094 | -1.4 ppm |
| 1383.5661 | [DM $\beta$ CD+CH <sub>2</sub> +K] <sup>+</sup>                 | 1383.5677 | -1.2 ppm |
| 1395.6231 | [DM $\beta$ CD+3CH <sub>2</sub> +Na] <sup>+</sup>               | 1395.6250 | -1.4 ppm |
| 1397.5815 | [DM $\beta$ CD+2CH <sub>2</sub> +K] <sup>+</sup>                | 1397.5833 | -1.3 ppm |

---

**Table S17.** Full scan mass spectrum of TM $\beta$ -cyclodextrin in 50/50 H<sub>2</sub>O/MeCN (100% = 4.86E6).

20191128\_TM $\beta$ CD\_pos #941-954 RT: 29.61-29.96 AV: 14 NL: 4.86E6  
T: FTMS + p NSI Full ms [150.00-2000.00]

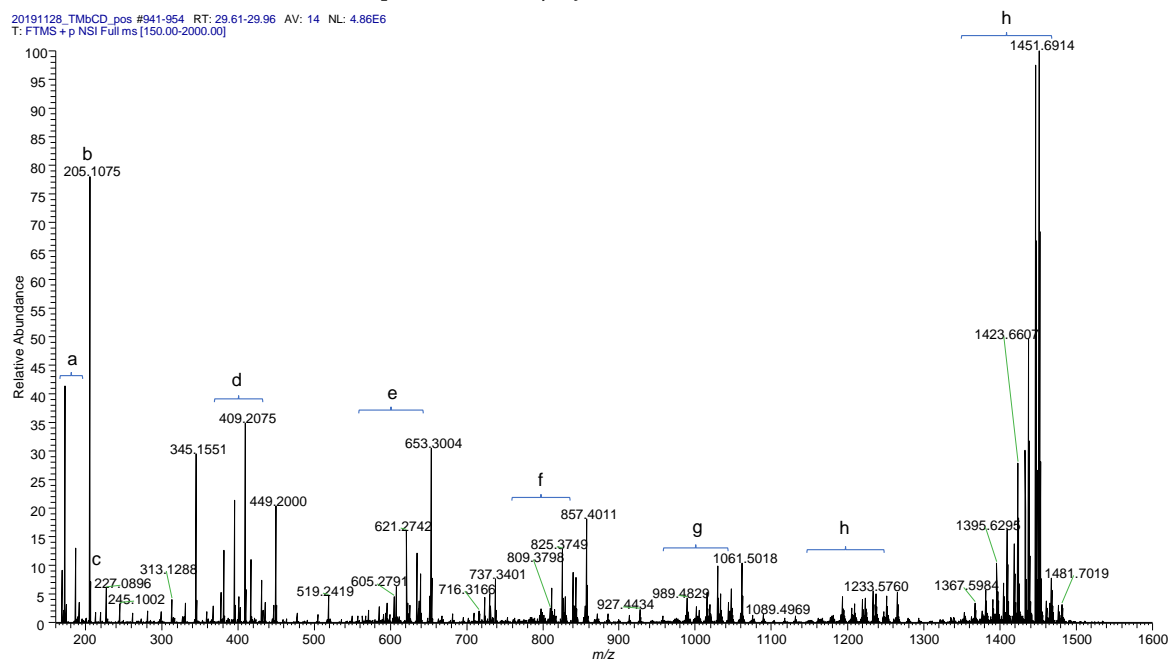

|   | <i>m/z</i> experimental | Name                                                    | <i>m/z</i> calculation | Error   |
|---|-------------------------|---------------------------------------------------------|------------------------|---------|
| a | 173.0811                | [TMglc-CH <sub>3</sub> OH+H] <sup>+</sup>               | 173.0808               | 1.7 ppm |
|   | 187.0968                | [TMglc-H <sub>2</sub> O+H] <sup>+</sup>                 | 187.0965               | 1.6 ppm |
|   | 191.0918                | [TMglc-CH <sub>2</sub> +H] <sup>+</sup>                 | 191.0914               | 2.1 ppm |
| b | 205.1075                | [TMglc+H] <sup>+</sup>                                  | 205.1071               | 2.0 ppm |
| c | 213.0738                | [TMglc-CH <sub>2</sub> +Na] <sup>+</sup>                | 213.0733               | 2.3 ppm |
| d | 353.1448                | [TMglc <sub>2</sub> -4CH <sub>2</sub> +H] <sup>+</sup>  | 353.1442               | 1.7 ppm |
|   | 367.1606                | [TMglc <sub>2</sub> -3CH <sub>2</sub> +H] <sup>+</sup>  | 367.1599               | 1.9 ppm |
|   | 381.1763                | [TMglc <sub>2</sub> -2CH <sub>2</sub> +H] <sup>+</sup>  | 381.1755               | 2.1 ppm |
|   | 389.1424                | [TMglc <sub>2</sub> -3CH <sub>2</sub> +Na] <sup>+</sup> | 389.1418               | 1.5 ppm |
|   | 395.1919                | [TMglc <sub>2</sub> -CH <sub>2</sub> +H] <sup>+</sup>   | 395.1912               | 1.8 ppm |
|   | 403.1582                | [TMglc <sub>2</sub> -2CH <sub>2</sub> +Na] <sup>+</sup> | 403.1575               | 1.7 ppm |
|   | 409.2075                | [TMglc <sub>2</sub> +H] <sup>+</sup>                    | 409.2068               | 1.7 ppm |
|   | 417.1738                | [TMglc <sub>2</sub> -CH <sub>2</sub> +Na] <sup>+</sup>  | 417.1731               | 1.7 ppm |
| e | 431.1894                | [TMglc <sub>2</sub> +Na] <sup>+</sup>                   | 431.1888               | 1.4 ppm |
|   | 557.2448                | [TMglc <sub>3</sub> -4CH <sub>2</sub> +H] <sup>+</sup>  | 557.2440               | 1.4 ppm |
|   | 571.2605                | [TMglc <sub>3</sub> -3CH <sub>2</sub> +H] <sup>+</sup>  | 571.2596               | 1.6 ppm |
|   | 579.2269                | [TMglc <sub>3</sub> -4CH <sub>2</sub> +Na] <sup>+</sup> | 579.2259               | 1.7 ppm |
|   | 585.2763                | [TMglc <sub>3</sub> -2CH <sub>2</sub> +H] <sup>+</sup>  | 585.2753               | 1.7 ppm |
|   | 593.2425                | [TMglc <sub>3</sub> -3CH <sub>2</sub> +Na] <sup>+</sup> | 593.2416               | 1.5 ppm |
|   | 599.2919                | [TMglc <sub>3</sub> -CH <sub>2</sub> +H] <sup>+</sup>   | 599.2909               | 1.7 ppm |
|   | 607.2584                | [TMglc <sub>3</sub> -2CH <sub>2</sub> +Na] <sup>+</sup> | 607.2572               | 2.0 ppm |
| f | 621.2742                | [TMglc <sub>3</sub> -CH <sub>2</sub> +Na] <sup>+</sup>  | 621.2729               | 2.1 ppm |
|   | 635.2899                | [TMglc <sub>3</sub> +Na] <sup>+</sup>                   | 635.2885               | 2.2 ppm |
|   | 761.3456                | [TMglc <sub>4</sub> -4CH <sub>2</sub> +H] <sup>+</sup>  | 761.3438               | 2.4 ppm |
|   | 769.3120                | [TMglc <sub>4</sub> -5CH <sub>2</sub> +Na] <sup>+</sup> | 769.3101               | 2.5 ppm |
|   | 775.3613                | [TMglc <sub>4</sub> -3CH <sub>2</sub> +H] <sup>+</sup>  | 775.3594               | 2.5 ppm |
|   | 783.3276                | [TMglc <sub>4</sub> -4CH <sub>2</sub> +Na] <sup>+</sup> | 783.3257               | 2.4 ppm |
|   | 789.3771                | [TMglc <sub>4</sub> -2CH <sub>2</sub> +H] <sup>+</sup>  | 789.3751               | 2.5 ppm |
|   | 797.3434                | [TMglc <sub>4</sub> -3CH <sub>2</sub> +Na] <sup>+</sup> | 797.3414               | 2.5 ppm |
|   | 803.3928                | [TMglc <sub>4</sub> -CH <sub>2</sub> +H] <sup>+</sup>   | 803.3907               | 2.6 ppm |
|   | 811.3591                | [TMglc <sub>4</sub> -2CH <sub>2</sub> +Na] <sup>+</sup> | 811.3570               | 2.6 ppm |

|   |           |                                                         |           |         |
|---|-----------|---------------------------------------------------------|-----------|---------|
|   | 817.4084  | [TMglc <sub>4</sub> +H] <sup>+</sup>                    | 817.4064  | 2.4 ppm |
|   | 825.3749  | [TMglc <sub>4</sub> -CH <sub>2</sub> +Na] <sup>+</sup>  | 825.3727  | 2.7 ppm |
|   | 839.3905  | [TMglc <sub>4</sub> +Na] <sup>+</sup>                   | 839.3883  | 2.6 ppm |
| g | 959.3972  | [TMglc <sub>5</sub> -6CH <sub>2</sub> +Na] <sup>+</sup> | 959.3942  | 3.1 ppm |
|   | 973.4124  | [TMglc <sub>5</sub> -5CH <sub>2</sub> +Na] <sup>+</sup> | 973.4098  | 2.7 ppm |
|   | 987.4283  | [TMglc <sub>5</sub> -4CH <sub>2</sub> +Na] <sup>+</sup> | 987.4255  | 2.8 ppm |
|   | 993.4776  | [TMglc <sub>5</sub> -2CH <sub>2</sub> +H] <sup>+</sup>  | 993.4748  | 2.8 ppm |
|   | 1001.4442 | [TMglc <sub>5</sub> -3CH <sub>2</sub> +Na] <sup>+</sup> | 1001.4411 | 3.1 ppm |
|   | 1007.4935 | [TMglc <sub>5</sub> -CH <sub>2</sub> +H] <sup>+</sup>   | 1007.4905 | 3.0 ppm |
|   | 1015.4598 | [TMglc <sub>5</sub> -2CH <sub>2</sub> +Na] <sup>+</sup> | 1015.4568 | 3.0 ppm |
|   | 1021.5092 | [TMglc <sub>5</sub> +H] <sup>+</sup>                    | 1021.5061 | 3.0 ppm |
|   | 1029.4756 | [TMglc <sub>5</sub> -CH <sub>2</sub> +Na] <sup>+</sup>  | 1029.4724 | 3.1 ppm |
|   | 1043.4911 | [TMglc <sub>5</sub> +Na] <sup>+</sup>                   | 1043.4881 | 2.9 ppm |
| h | 1149.4823 | [TMglc <sub>6</sub> -7CH <sub>2</sub> +Na] <sup>+</sup> | 1149.4783 | 3.5 ppm |
|   | 1163.4976 | [TMglc <sub>6</sub> -6CH <sub>2</sub> +Na] <sup>+</sup> | 1163.4940 | 3.1 ppm |
|   | 1177.5133 | [TMglc <sub>6</sub> -5CH <sub>2</sub> +Na] <sup>+</sup> | 1177.5096 | 3.1 ppm |
|   | 1183.5631 | [TMglc <sub>6</sub> -3CH <sub>2</sub> +H] <sup>+</sup>  | 1183.5590 | 3.5 ppm |
|   | 1191.5291 | [TMglc <sub>6</sub> -4CH <sub>2</sub> +Na] <sup>+</sup> | 1191.5253 | 3.2 ppm |
|   | 1197.5789 | [TMglc <sub>6</sub> -2CH <sub>2</sub> +H] <sup>+</sup>  | 1197.5746 | 3.6 ppm |
|   | 1205.5447 | [TMglc <sub>6</sub> -3CH <sub>2</sub> +Na] <sup>+</sup> | 1205.5409 | 3.2 ppm |
|   | 1211.5943 | [TMglc <sub>6</sub> -CH <sub>2</sub> +H] <sup>+</sup>   | 1211.5903 | 3.3 ppm |
|   | 1219.5603 | [TMglc <sub>6</sub> -2CH <sub>2</sub> +Na] <sup>+</sup> | 1219.5566 | 3.0 ppm |
|   | 1225.6098 | [TMglc <sub>6</sub> +H] <sup>+</sup>                    | 1225.6059 | 3.2 ppm |
|   | 1233.5760 | [TMglc <sub>6</sub> -CH <sub>2</sub> +Na] <sup>+</sup>  | 1233.5722 | 3.1 ppm |
|   | 1247.5913 | [TMglc <sub>6</sub> +Na] <sup>+</sup>                   | 1247.5879 | 2.7 ppm |
| i | 1348.6275 | [TMβCD-7CH <sub>2</sub> +NH <sub>4</sub> ] <sup>+</sup> | 1348.6227 | 3.6 ppm |
|   | 1353.5828 | [TMβCD-7CH <sub>2</sub> +Na] <sup>+</sup>               | 1353.5781 | 3.5 ppm |
|   | 1359.6325 | [TMβCD-5CH <sub>2</sub> +H] <sup>+</sup>                | 1359.6274 | 3.8 ppm |
|   | 1362.6433 | [TMβCD-6CH <sub>2</sub> +NH <sub>4</sub> ] <sup>+</sup> | 1362.6383 | 3.7 ppm |
|   | 1367.5984 | [TMβCD-6CH <sub>2</sub> +Na] <sup>+</sup>               | 1367.5937 | 3.4 ppm |
|   | 1373.6481 | [TMβCD-4CH <sub>2</sub> +H] <sup>+</sup>                | 1373.6431 | 3.6 ppm |
|   | 1376.6588 | [TMβCD-5CH <sub>2</sub> +NH <sub>4</sub> ] <sup>+</sup> | 1376.6540 | 3.5 ppm |
|   | 1381.6141 | [TMβCD-5CH <sub>2</sub> +Na] <sup>+</sup>               | 1381.6094 | 3.4 ppm |
|   | 1387.6632 | [TMβCD-3CH <sub>2</sub> +H] <sup>+</sup>                | 1387.6587 | 3.2 ppm |
|   | 1390.6744 | [TMβCD-4CH <sub>2</sub> +NH <sub>4</sub> ] <sup>+</sup> | 1390.6696 | 3.5 ppm |
|   | 1395.6295 | [TMβCD-4CH <sub>2</sub> +Na] <sup>+</sup>               | 1395.6250 | 3.2 ppm |
|   | 1401.6792 | [TMβCD-2CH <sub>2</sub> +H] <sup>+</sup>                | 1401.6744 | 3.4 ppm |
|   | 1404.6899 | [TMβCD-3CH <sub>2</sub> +NH <sub>4</sub> ] <sup>+</sup> | 1404.6853 | 3.3 ppm |
|   | 1409.6453 | [TMβCD-3CH <sub>2</sub> +Na] <sup>+</sup>               | 1409.6407 | 3.3 ppm |
|   | 1415.6947 | [TMβCD-CH <sub>2</sub> +H] <sup>+</sup>                 | 1415.6900 | 3.3 ppm |
|   | 1418.7055 | [TMβCD-2CH <sub>2</sub> +NH <sub>4</sub> ] <sup>+</sup> | 1418.7009 | 3.2 ppm |
|   | 1423.6607 | [TMβCD-2CH <sub>2</sub> +Na] <sup>+</sup>               | 1423.6563 | 3.1 ppm |
|   | 1429.7100 | [TMβCD+H] <sup>+</sup>                                  | 1429.7057 | 3.0 ppm |
|   | 1432.7210 | [TMβCD-CH <sub>2</sub> +NH <sub>4</sub> ] <sup>+</sup>  | 1432.7166 | 3.1 ppm |
|   | 1437.6762 | [TMβCD-CH <sub>2</sub> +Na] <sup>+</sup>                | 1437.6720 | 2.9 ppm |
|   | 1439.6319 | [TMβCD-2CH <sub>2</sub> +K] <sup>+</sup>                | 1439.6303 | 1.1 ppm |
|   | 1446.7364 | [TMβCD+NH <sub>4</sub> ] <sup>+</sup>                   | 1446.7322 | 2.9 ppm |
|   | 1451.6914 | [TMβCD+Na] <sup>+</sup>                                 | 1451.6876 | 2.6 ppm |
|   | 1453.6497 | [TMβCD-CH <sub>2</sub> +K] <sup>+</sup>                 | 1453.6459 | 2.6 ppm |
|   | 1467.6652 | [TMβCD+K] <sup>+</sup>                                  | 1467.6616 | 2.5 ppm |

**Table S18.** Full scan mass spectrum of the DM $\beta$ -cyclodextrin/phenylalanine mixture in 50/50 H<sub>2</sub>O/MeCN (100% = 1.08E7).

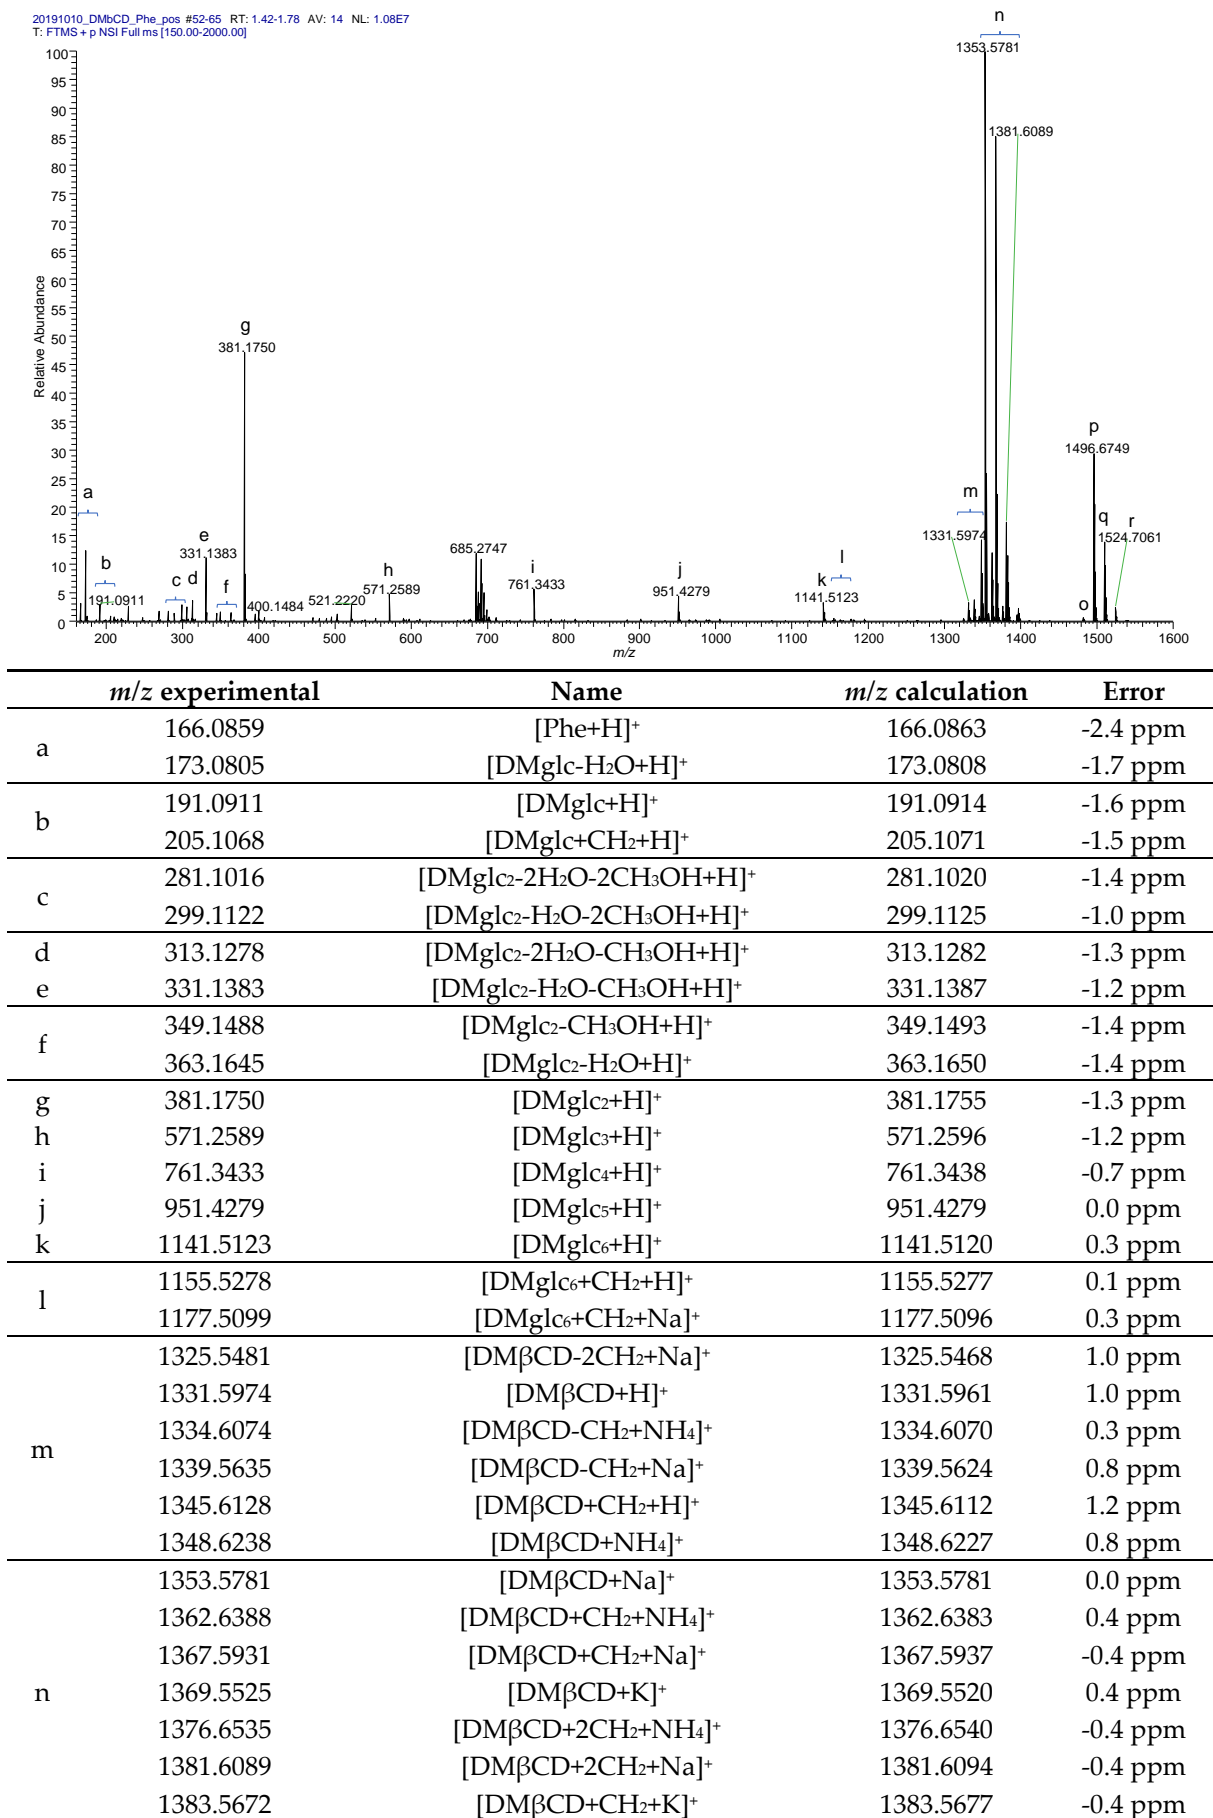

|   |           |                                                            |           |          |
|---|-----------|------------------------------------------------------------|-----------|----------|
|   | 1395.6243 | [DMβCD+3CH <sub>2</sub> +Na] <sup>+</sup>                  | 1395.6250 | -0.5 ppm |
|   | 1397.5826 | [DMβCD+2CH <sub>2</sub> +K] <sup>+</sup>                   | 1397.5833 | -0.5 ppm |
| o | 1482.6595 | [DMβCD-CH <sub>2</sub> +Phe+H] <sup>+</sup>                | 1482.6595 | 0.0 ppm  |
| p | 1496.6749 | [DMβCD+Phe+H] <sup>+</sup>                                 | 1496.6751 | -0.1 ppm |
|   | 1499.6838 | [DMβCD-CH <sub>2</sub> +Phe+NH <sub>4</sub> ] <sup>+</sup> | 1499.6860 | -1.5 ppm |
| q | 1510.6906 | [DMβCD+CH <sub>2</sub> +Phe+H] <sup>+</sup>                | 1510.6908 | -0.1 ppm |
|   | 1513.6995 | [DMβCD+Phe+NH <sub>4</sub> ] <sup>+</sup>                  | 1513.7017 | -1.5 ppm |
| r | 1524.7061 | [DMβCD+2CH <sub>2</sub> +Phe+H] <sup>+</sup>               | 1524.7064 | -0.2 ppm |

**Table S19.** Tandem mass spectrum of the DMβ-cyclodextrin/phenylalanine mixture in 50/50 H<sub>2</sub>O/MeCN.

Precursor ion: [DMβCD+Phe+H]<sup>+</sup> *m/z* 1496.70, HCD at 15% NCE (40 eV), 100% = 1.08E6.

20191010\_DMβCD\_Phe\_pos #178-202 RT: 5.21-5.94 AV: 25 NL: 1.08E6  
T: FTMS + c NSI Full ms2 1496.70@hcd15.00 [150.00-2000.00]

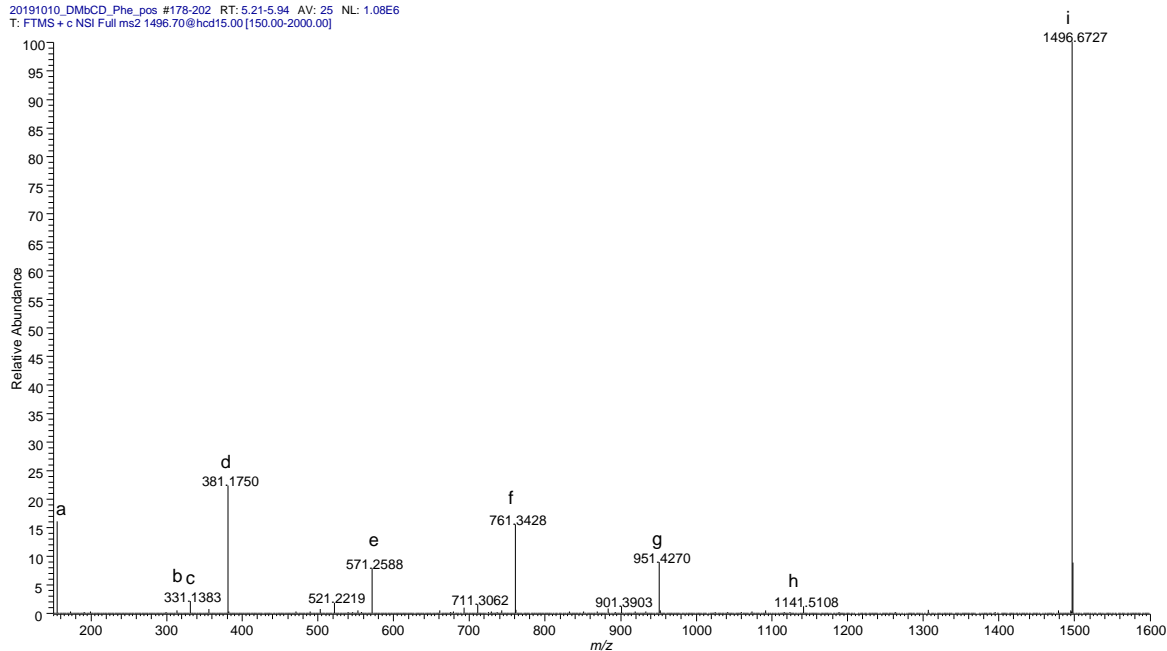

|   | <i>m/z</i> experimental | Name                                                                      | <i>m/z</i> calculation | Error    |
|---|-------------------------|---------------------------------------------------------------------------|------------------------|----------|
| a | 155.0700                | [DMglc-2H <sub>2</sub> O+H] <sup>+</sup>                                  | 155.0703               | -1.9 ppm |
| b | 313.1278                | [DMglc <sub>2</sub> -2H <sub>2</sub> O-CH <sub>3</sub> OH+H] <sup>+</sup> | 313.1282               | -1.3 ppm |
| c | 331.1383                | [DMglc <sub>2</sub> -H <sub>2</sub> O-CH <sub>3</sub> OH+H] <sup>+</sup>  | 331.1387               | -1.2 ppm |
| d | 381.1750                | [DMglc <sub>2</sub> +H] <sup>+</sup>                                      | 381.1755               | -1.3 ppm |
| e | 571.2588                | [DMglc <sub>3</sub> +H] <sup>+</sup>                                      | 571.2596               | -1.4 ppm |
| f | 761.3428                | [DMglc <sub>4</sub> +H] <sup>+</sup>                                      | 761.3438               | -1.3 ppm |
| g | 951.4270                | [DMglc <sub>5</sub> +H] <sup>+</sup>                                      | 951.4279               | -0.9 ppm |
| h | 1141.5108               | [DMglc <sub>6</sub> +H] <sup>+</sup>                                      | 1141.5120              | -1.1 ppm |
| i | 1496.6727               | [DMβCD+Phe+H] <sup>+</sup>                                                | 1496.6751              | -1.6 ppm |

**Table S20.** Full scan mass spectrum of the DM $\beta$ -cyclodextrin/titanocene dichloride mixture in 50/50 H<sub>2</sub>O/MeCN (100% = 7.57E7).

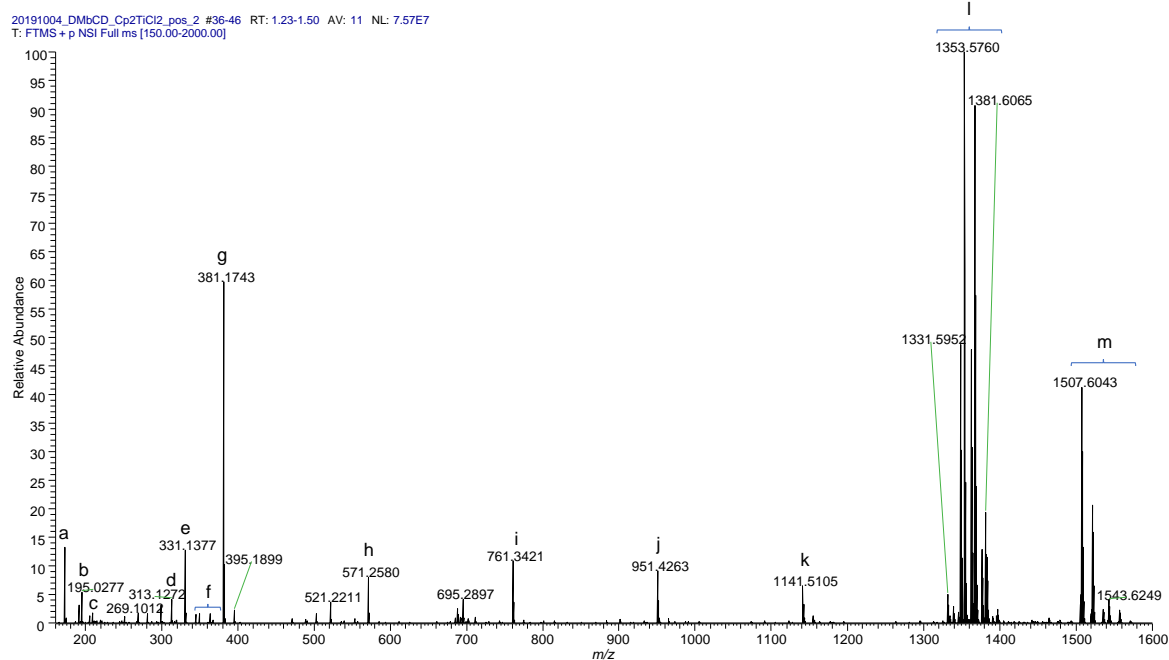

|   | $m/z$ experimental | Name                                                                       | $m/z$ calculation | Error    |
|---|--------------------|----------------------------------------------------------------------------|-------------------|----------|
| a | 173.0802           | [DMglc-H <sub>2</sub> O+H] <sup>+</sup>                                    | 173.0808          | -3.5 ppm |
|   | 191.0908           | [DMglc+H] <sup>+</sup>                                                     | 191.0914          | -3.1 ppm |
| b | 195.0277           | [Cp <sub>2</sub> Ti(OH)] <sup>+</sup>                                      | 195.0284          | -3.6 ppm |
|   | 205.1064           | [DMglc+CH <sub>2</sub> +H] <sup>+</sup>                                    | 205.1071          | -3.4 ppm |
| c | 281.1011           | [DMglc <sub>2</sub> -2H <sub>2</sub> O-2CH <sub>3</sub> OH+H] <sup>+</sup> | 281.1020          | -3.2 ppm |
|   | 299.1116           | [DMglc <sub>2</sub> -H <sub>2</sub> O-2CH <sub>3</sub> OH+H] <sup>+</sup>  | 299.1125          | -3.0 ppm |
| d | 313.1272           | [DMglc <sub>2</sub> -2H <sub>2</sub> O-CH <sub>3</sub> OH+H] <sup>+</sup>  | 313.1282          | -3.2 ppm |
| e | 331.1377           | [DMglc <sub>2</sub> -H <sub>2</sub> O-CH <sub>3</sub> OH+H] <sup>+</sup>   | 331.1387          | -3.0 ppm |
|   | 349.1482           | [DMglc <sub>2</sub> -CH <sub>3</sub> OH+H] <sup>+</sup>                    | 349.1493          | -3.2 ppm |
| f | 363.1639           | [DMglc <sub>2</sub> -H <sub>2</sub> O+H] <sup>+</sup>                      | 363.1650          | -3.0 ppm |
|   | 367.1008           | [DMglc+Cp <sub>2</sub> Ti-H] <sup>+</sup>                                  | 367.1019          | -3.0 ppm |
|   | 367.1587           | [DMglc <sub>2</sub> -CH <sub>2</sub> +H] <sup>+</sup>                      | 367.1599          | -3.3 ppm |
| g | 381.1743           | [DMglc <sub>2</sub> +H] <sup>+</sup>                                       | 381.1755          | -3.1 ppm |
| h | 571.2580           | [DMglc <sub>3</sub> +H] <sup>+</sup>                                       | 571.2596          | -2.8 ppm |
|   | 761.3421           | [DMglc <sub>4</sub> +H] <sup>+</sup>                                       | 761.3438          | -2.2 ppm |
| i | 775.3576           | [DMglc <sub>4</sub> +CH <sub>2</sub> +H] <sup>+</sup>                      | 775.3594          | -2.3 ppm |
|   | 951.4263           | [DMglc <sub>5</sub> +H] <sup>+</sup>                                       | 951.4279          | -1.7 ppm |
| j | 965.4419           | [DMglc <sub>5</sub> +CH <sub>2</sub> +H] <sup>+</sup>                      | 965.4435          | -1.7 ppm |
|   | 1141.5105          | [DMglc <sub>6</sub> +H] <sup>+</sup>                                       | 1141.5120         | -1.3 ppm |
| k | 1155.5259          | [DMglc <sub>6</sub> +CH <sub>2</sub> +H] <sup>+</sup>                      | 1155.5277         | -1.6 ppm |
|   | 1325.5461          | [DMβCD-2CH <sub>2</sub> +Na] <sup>+</sup>                                  | 1325.5468         | -0.5 ppm |
|   | 1331.5952          | [DMβCD+H] <sup>+</sup>                                                     | 1331.5961         | -0.7 ppm |
|   | 1334.6058          | [DMβCD-CH <sub>2</sub> +NH <sub>4</sub> ] <sup>+</sup>                     | 1334.6070         | -0.9 ppm |
|   | 1339.5616          | [DMβCD-CH <sub>2</sub> +Na] <sup>+</sup>                                   | 1339.5624         | -0.6 ppm |
|   | 1345.6107          | [DMβCD+CH <sub>2</sub> +H] <sup>+</sup>                                    | 1345.6112         | -0.4 ppm |
| l | 1348.6215          | [DMβCD+NH <sub>4</sub> ] <sup>+</sup>                                      | 1348.6227         | -0.9 ppm |
|   | 1353.5760          | [DMβCD+Na] <sup>+</sup>                                                    | 1353.5781         | -1.6 ppm |
|   | 1358.6069          | [DMβCD+CH <sub>2</sub> +Ti-4H+NH <sub>4</sub> ] <sup>+</sup>               | 1358.6070         | -0.1 ppm |
|   | 1362.6363          | [DMβCD+CH <sub>2</sub> +NH <sub>4</sub> ] <sup>+</sup>                     | 1362.6383         | -1.5 ppm |
|   | 1367.5910          | [DMβCD+CH <sub>2</sub> +Na] <sup>+</sup>                                   | 1367.5937         | -2.0 ppm |

|   |           |                                                                                       |           |          |
|---|-----------|---------------------------------------------------------------------------------------|-----------|----------|
|   | 1369.5501 | [DM $\beta$ CD+K] <sup>+</sup>                                                        | 1369.5520 | -1.4 ppm |
|   | 1376.6515 | [DM $\beta$ CD+2CH <sub>2</sub> +NH <sub>4</sub> ] <sup>+</sup>                       | 1376.6540 | -1.8 ppm |
|   | 1381.6065 | [DM $\beta$ CD+2CH <sub>2</sub> +Na] <sup>+</sup>                                     | 1381.6094 | -2.1 ppm |
|   | 1383.5650 | [DM $\beta$ CD+CH <sub>2</sub> +K] <sup>+</sup>                                       | 1383.5677 | -2.0 ppm |
|   | 1390.6665 | [DM $\beta$ CD+3CH <sub>2</sub> +NH <sub>4</sub> ] <sup>+</sup>                       | 1390.6696 | -2.2 ppm |
|   | 1395.6221 | [DM $\beta$ CD+3CH <sub>2</sub> +Na] <sup>+</sup>                                     | 1395.6250 | -2.1 ppm |
|   | 1397.5802 | [DM $\beta$ CD+2CH <sub>2</sub> +K] <sup>+</sup>                                      | 1397.5833 | -2.2 ppm |
|   | 1404.6824 | [DM $\beta$ CD+4CH <sub>2</sub> +NH <sub>4</sub> ] <sup>+</sup>                       | 1404.6853 | -2.1 ppm |
| m | 1493.5883 | [DM $\beta$ CD-CH <sub>2</sub> +Cp <sub>2</sub> Ti-H] <sup>+</sup>                    | 1493.5910 | -1.8 ppm |
|   | 1507.6043 | [DM $\beta$ CD+Cp <sub>2</sub> Ti-H] <sup>+</sup>                                     | 1507.6067 | -1.6 ppm |
|   | 1521.6197 | [DM $\beta$ CD+CH <sub>2</sub> +Cp <sub>2</sub> Ti-H] <sup>+</sup>                    | 1521.6223 | -1.7 ppm |
|   | 1535.6349 | [DM $\beta$ CD+2CH <sub>2</sub> +Cp <sub>2</sub> Ti-H] <sup>+</sup>                   | 1535.6380 | -2.0 ppm |
|   | 1543.6249 | [DM $\beta$ CD+Cp <sub>2</sub> Ti(OH) <sub>2</sub> +H] <sup>+</sup>                   | 1543.6278 | -1.9 ppm |
|   | 1557.6405 | [DM $\beta$ CD+CH <sub>2</sub> +Cp <sub>2</sub> Ti(OH) <sub>2</sub> +H] <sup>+</sup>  | 1557.6435 | -1.9 ppm |
|   | 1571.6559 | [DM $\beta$ CD+2CH <sub>2</sub> +Cp <sub>2</sub> Ti(OH) <sub>2</sub> +H] <sup>+</sup> | 1571.6591 | -2.0 ppm |



**Table S21.** Tandem mass spectrum of the DM $\beta$ -cyclodextrin/titanocene dichloride mixture in 50/50 H<sub>2</sub>O/MeCN.  
Precursor ion: [DM $\beta$ CD+Cp<sub>2</sub>Ti-H]<sup>+</sup> *m/z* 1507.60, HCD at 20% NCE (54 eV), 100% = 1.18E6.

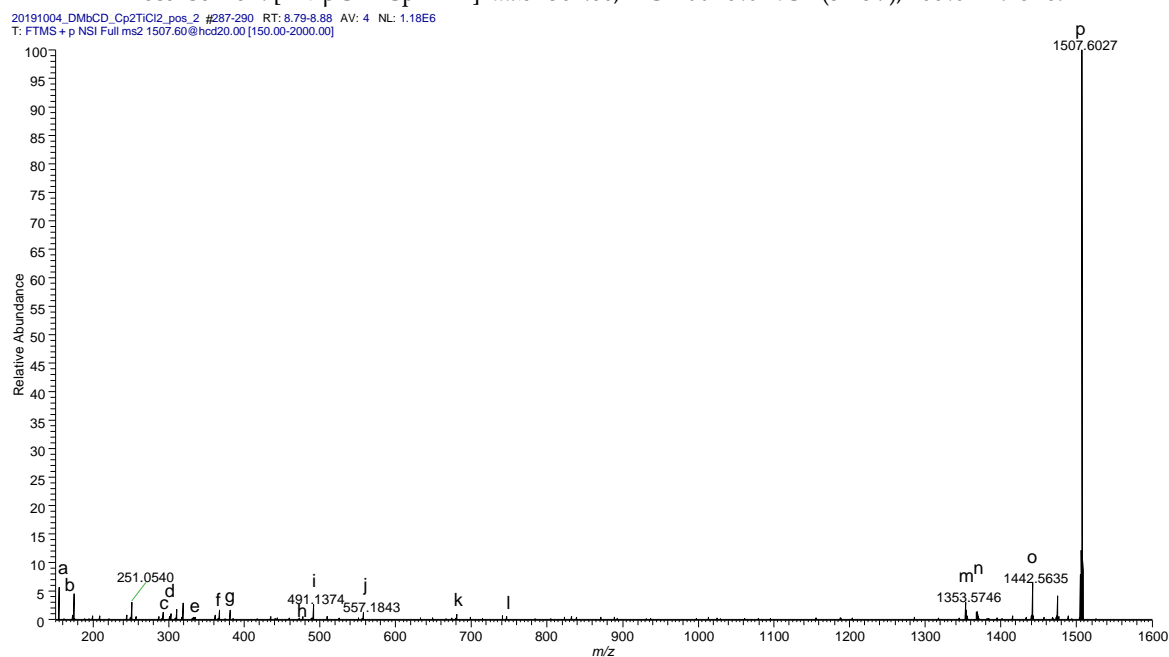

|   | <i>m/z</i> experimental | Name                                                         | <i>m/z</i> calculation | Error    |
|---|-------------------------|--------------------------------------------------------------|------------------------|----------|
| a | 155.0697                | [DMglc-2H <sub>2</sub> O+H] <sup>+</sup>                     | 155.0703               | -3.9 ppm |
| b | 173.0803                | [DMglc-H <sub>2</sub> O+H] <sup>+</sup>                      | 173.0808               | -2.9 ppm |
| c | 287.0386                | [DMglc-CH <sub>2</sub> +CpTi-2H] <sup>+</sup>                | 287.0393               | -2.4 ppm |
| d | 301.0542                | [DMglc+CpTi-2H] <sup>+</sup>                                 | 301.0550               | -2.7 ppm |
| e | 335.0748                | [DMglc-CH <sub>3</sub> OH+Cp <sub>2</sub> Ti-H] <sup>+</sup> | 335.0757               | -2.7 ppm |
| f | 367.1009                | [DMglc+Cp <sub>2</sub> Ti-H] <sup>+</sup>                    | 367.1019               | -2.7 ppm |
| g | 381.1744                | [DMglc <sub>2</sub> +H] <sup>+</sup>                         | 381.1755               | -2.9 ppm |
| h | 477.1218                | [DMglc <sub>2</sub> -CH <sub>2</sub> +CpTi-2H] <sup>+</sup>  | 477.1235               | -3.6 ppm |
| i | 491.1374                | [DMglc <sub>2</sub> +CpTi-2H] <sup>+</sup>                   | 491.1391               | -3.5 ppm |
| j | 557.1843                | [DMglc <sub>2</sub> +Cp <sub>2</sub> Ti-H] <sup>+</sup>      | 557.1861               | -3.2 ppm |
| k | 681.2214                | [DMglc <sub>3</sub> +CpTi-2H] <sup>+</sup>                   | 681.2232               | -2.6 ppm |
| l | 747.2682                | [DMglc <sub>3</sub> +Cp <sub>2</sub> Ti-H] <sup>+</sup>      | 747.2702               | -2.7 ppm |
| m | 1353.5746               | [DMβCD+Na] <sup>+</sup>                                      | 1353.5781              | -2.6 ppm |
| n | 1369.5496               | [DMβCD+K] <sup>+</sup>                                       | 1369.5520              | -1.8 ppm |
| o | 1442.5635               | [DMβCD+CpTi-H] <sup>+</sup>                                  | 1442.5676              | -2.8 ppm |
| p | 1507.6027               | [DMβCD+Cp <sub>2</sub> Ti-H] <sup>+</sup>                    | 1507.6067              | -2.7 ppm |

**Table S22.** Full scan mass spectrum of the TM $\beta$ -cyclodextrin/phenylalanine mixture in 50/50 H<sub>2</sub>O/MeCN (100% = 7.74E7).

20190429\_Phe\_Tri-M-b-CD\_pos #1-3 RT: 0.01-0.06 AV: 3 NL: 7.74E7  
T: FTMS + p NSI Full ms [150.00-2000.00]

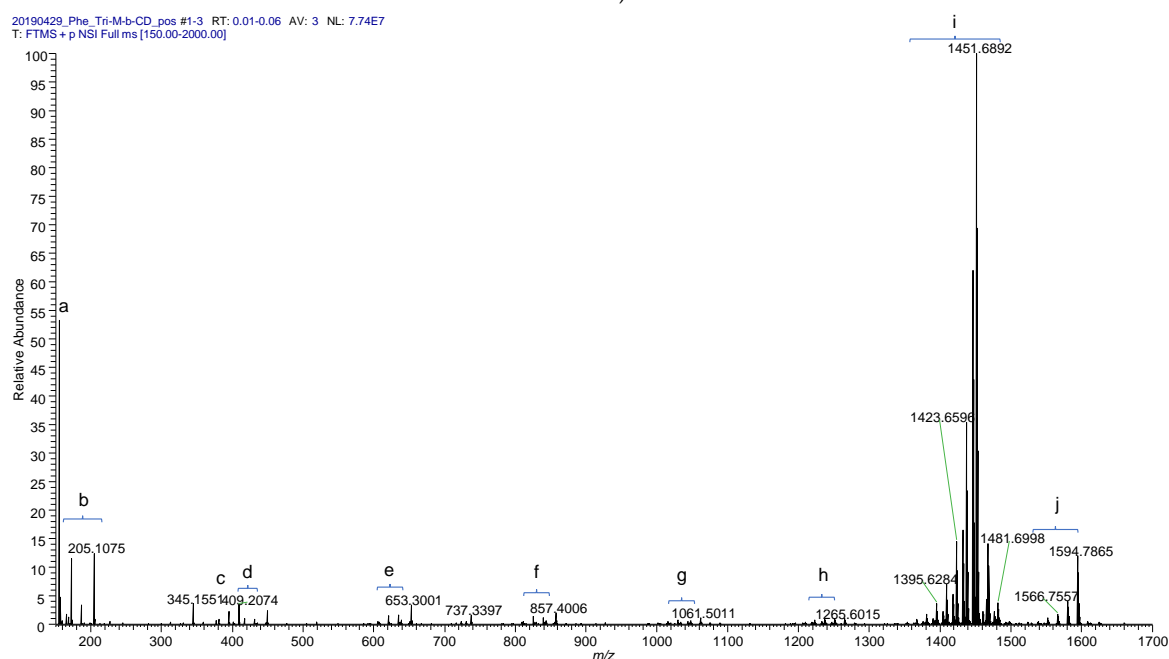

|   | <i>m/z</i> experimental | Name                                                       | <i>m/z</i> calculation | Error   |
|---|-------------------------|------------------------------------------------------------|------------------------|---------|
| a | 155.0705                | [TMglc-H <sub>2</sub> O-CH <sub>3</sub> OH+H] <sup>+</sup> | 155.0703               | 1.3 ppm |
|   | 166.0865                | [Phe+H] <sup>+</sup>                                       | 166.0863               | 1.2 ppm |
| b | 173.0811                | [TMglc-CH <sub>3</sub> OH+H] <sup>+</sup>                  | 173.0808               | 1.7 ppm |
|   | 187.0968                | [TMglc-H <sub>2</sub> O+H] <sup>+</sup>                    | 187.0965               | 1.6 ppm |
|   | 205.1075                | [TMglc+H] <sup>+</sup>                                     | 205.1071               | 2.0 ppm |
| c | 381.1761                | [TMglc <sub>2</sub> -2CH <sub>2</sub> +H] <sup>+</sup>     | 381.1755               | 1.6 ppm |
|   | 395.1918                | [TMglc <sub>2</sub> -CH <sub>2</sub> +H] <sup>+</sup>      | 395.1912               | 1.5 ppm |
|   | 409.2074                | [TMglc <sub>2</sub> +H] <sup>+</sup>                       | 409.2068               | 1.5 ppm |
| d | 417.1737                | [TMglc <sub>2</sub> -CH <sub>2</sub> +Na] <sup>+</sup>     | 417.1731               | 1.4 ppm |
|   | 431.1894                | [TMglc <sub>2</sub> +Na] <sup>+</sup>                      | 431.1888               | 1.4 ppm |
|   | 607.2579                | [TMglc <sub>3</sub> -2CH <sub>2</sub> +Na] <sup>+</sup>    | 607.2572               | 1.2 ppm |
| e | 621.2739                | [TMglc <sub>3</sub> -CH <sub>2</sub> +Na] <sup>+</sup>     | 621.2729               | 1.6 ppm |
|   | 635.2893                | [TMglc <sub>3</sub> +Na] <sup>+</sup>                      | 635.2885               | 1.3 ppm |
|   | 811.3587                | [TMglc <sub>4</sub> -2CH <sub>2</sub> +Na] <sup>+</sup>    | 811.3570               | 2.1 ppm |
| f | 825.3743                | [TMglc <sub>4</sub> -CH <sub>2</sub> +Na] <sup>+</sup>     | 825.3727               | 1.9 ppm |
|   | 839.3898                | [TMglc <sub>4</sub> +Na] <sup>+</sup>                      | 839.3883               | 1.8 ppm |
|   | 1015.4592               | [TMglc <sub>5</sub> -2CH <sub>2</sub> +Na] <sup>+</sup>    | 1015.4568              | 2.4 ppm |
| g | 1029.4747               | [TMglc <sub>5</sub> -CH <sub>2</sub> +Na] <sup>+</sup>     | 1029.4724              | 2.2 ppm |
|   | 1043.4900               | [TMglc <sub>5</sub> +Na] <sup>+</sup>                      | 1043.4881              | 1.8 ppm |
|   | 1219.5590               | [TMglc <sub>6</sub> -2CH <sub>2</sub> +Na] <sup>+</sup>    | 1219.5566              | 2.0 ppm |
| h | 1233.5745               | [TMglc <sub>6</sub> -CH <sub>2</sub> +Na] <sup>+</sup>     | 1233.5722              | 1.9 ppm |
|   | 1247.5900               | [TMglc <sub>6</sub> +Na] <sup>+</sup>                      | 1247.5879              | 1.7 ppm |
|   | 1353.5821               | [TMβCD-7CH <sub>2</sub> +Na] <sup>+</sup>                  | 1353.5781              | 3.0 ppm |
|   | 1367.5973               | [TMβCD-6CH <sub>2</sub> +Na] <sup>+</sup>                  | 1367.5937              | 2.6 ppm |
|   | 1376.6575               | [TMβCD-5CH <sub>2</sub> +NH <sub>4</sub> ] <sup>+</sup>    | 1376.6540              | 2.5 ppm |
| i | 1381.6131               | [TMβCD-5CH <sub>2</sub> +Na] <sup>+</sup>                  | 1381.6094              | 2.7 ppm |
|   | 1390.6733               | [TMβCD-4CH <sub>2</sub> +NH <sub>4</sub> ] <sup>+</sup>    | 1390.6696              | 2.7 ppm |
|   | 1395.6284               | [TMβCD-4CH <sub>2</sub> +Na] <sup>+</sup>                  | 1395.6250              | 2.4 ppm |
|   | 1404.6889               | [TMβCD-3CH <sub>2</sub> +NH <sub>4</sub> ] <sup>+</sup>    | 1404.6853              | 2.6 ppm |
|   | 1409.6441               | [TMβCD-3CH <sub>2</sub> +Na] <sup>+</sup>                  | 1409.6407              | 2.4 ppm |

|   |           |                                                            |           |          |
|---|-----------|------------------------------------------------------------|-----------|----------|
|   | 1418.7044 | [TMβCD-2CH <sub>2</sub> +NH <sub>4</sub> ] <sup>+</sup>    | 1418.7009 | 2.5 ppm  |
|   | 1423.6596 | [TMβCD-2CH <sub>2</sub> +Na] <sup>+</sup>                  | 1423.6563 | 2.3 ppm  |
|   | 1425.6128 | [TMβCD-3CH <sub>2</sub> +K] <sup>+</sup>                   | 1425.6146 | -1.3 ppm |
|   | 1432.7198 | [TMβCD-CH <sub>2</sub> +NH <sub>4</sub> ] <sup>+</sup>     | 1432.7166 | 2.2 ppm  |
|   | 1437.6748 | [TMβCD-CH <sub>2</sub> +Na] <sup>+</sup>                   | 1437.6720 | 1.9 ppm  |
|   | 1439.6313 | [TMβCD-2CH <sub>2</sub> +K] <sup>+</sup>                   | 1439.6303 | 0.7 ppm  |
|   | 1446.7347 | [TMβCD+NH <sub>4</sub> ] <sup>+</sup>                      | 1446.7322 | 1.7 ppm  |
|   | 1451.6892 | [TMβCD+Na] <sup>+</sup>                                    | 1451.6876 | 1.1 ppm  |
|   | 1453.6483 | [TMβCD-CH <sub>2</sub> +K] <sup>+</sup>                    | 1453.6459 | 1.7 ppm  |
|   | 1467.6637 | [TMβCD+K] <sup>+</sup>                                     | 1467.6616 | 1.4 ppm  |
| j | 1524.7102 | [TMβCD-5CH <sub>2</sub> +Phe+H] <sup>+</sup>               | 1524.7064 | 2.5 ppm  |
|   | 1538.7246 | [TMβCD-4CH <sub>2</sub> +Phe+H] <sup>+</sup>               | 1538.7221 | 1.6 ppm  |
|   | 1552.7401 | [TMβCD-3CH <sub>2</sub> +Phe+H] <sup>+</sup>               | 1552.7377 | 1.5 ppm  |
|   | 1566.7557 | [TMβCD-2CH <sub>2</sub> +Phe+H] <sup>+</sup>               | 1566.7534 | 1.5 ppm  |
|   | 1580.7709 | [TMβCD-CH <sub>2</sub> +Phe+H] <sup>+</sup>                | 1580.7690 | 1.2 ppm  |
|   | 1594.7865 | [TMβCD+Phe+H] <sup>+</sup>                                 | 1594.7847 | 1.1 ppm  |
|   | 1597.7957 | [TMβCD-CH <sub>2</sub> +Phe+NH <sub>4</sub> ] <sup>+</sup> | 1597.7956 | 0.1 ppm  |

**Table S23.** Tandem mass spectrum of the TMβ-cyclodextrin/phenylalanine mixture in 50/50 H<sub>2</sub>O/MeCN.

Precursor ion: [TMβCD+Phe+H]<sup>+</sup> *m/z* 1594.80, HCD at 15% NCE (43 eV), 100% = 2.22E5.

20190429\_Phe\_Tri-M-b-CD\_pos #317-332 RT: 9.10-9.56 AV: 16 NL: 2.22E5  
T: FTMS + p NSI Full ms2 1594.80@hcd15.00 [100.00-2000.00]

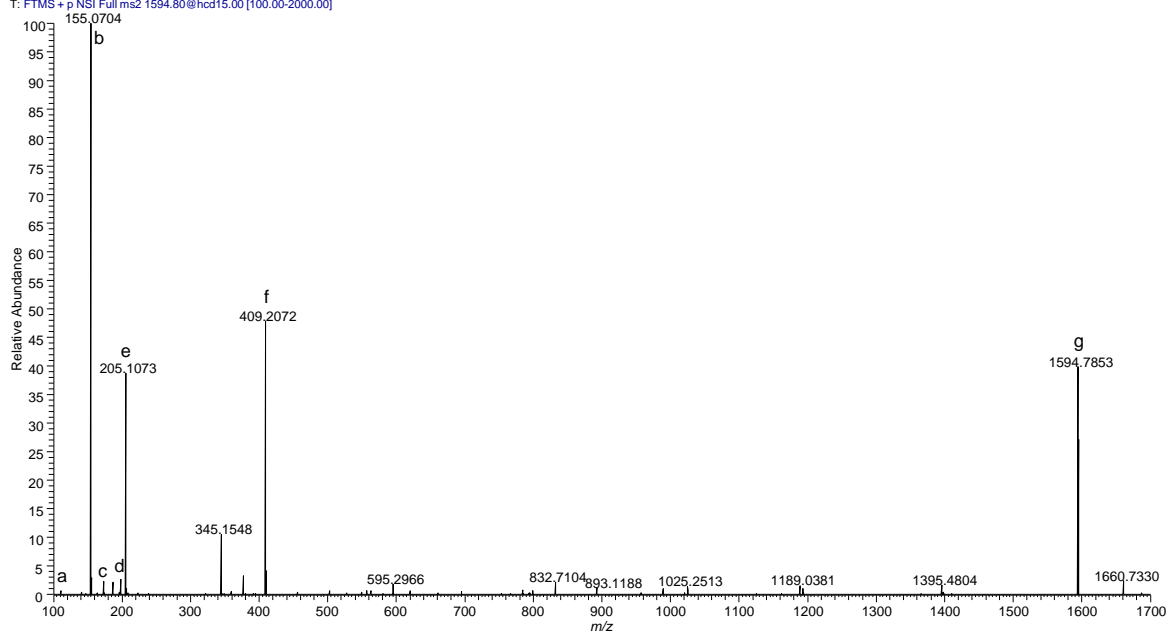

|   | <i>m/z</i> experimental | Name                                                         | <i>m/z</i> calculation | Error    |
|---|-------------------------|--------------------------------------------------------------|------------------------|----------|
| a | 111.0440                | [TMglc-2CH <sub>3</sub> OH-CH <sub>2</sub> O+H] <sup>+</sup> | 111.0441               | -0.9 ppm |
| b | 155.0704                | [TMglc-H <sub>2</sub> O-CH <sub>3</sub> OH+H] <sup>+</sup>   | 155.0703               | 0.6 ppm  |
| c | 173.0810                | [TMglc-CH <sub>3</sub> OH+H] <sup>+</sup>                    | 173.0808               | 1.2 ppm  |
| d | 187.0967                | [TMglc-H <sub>2</sub> O+H] <sup>+</sup>                      | 187.0965               | 1.1 ppm  |
| e | 205.1073                | [TMglc+H] <sup>+</sup>                                       | 205.1071               | 1.0 ppm  |
| f | 409.2072                | [TMglc <sub>2</sub> +H] <sup>+</sup>                         | 409.2068               | 1.0 ppm  |
| g | 1594.7853               | [TMβCD+Phe+H] <sup>+</sup>                                   | 1594.7847              | 0.4 ppm  |

**Table S24.** Full scan mass spectrum of the TM $\beta$ -cyclodextrin/titanocene dichloride mixture in 50/50 H<sub>2</sub>O/MeCN (100% = 4.65E7).

20190429\_Cp2TiCl2\_Tri-M-b-CD\_pos #62-83 RT: 1.67-2.24 AV: 22 NL: 4.65E7  
T: FTMS + p NSI Full ms [150.00-2000.00]

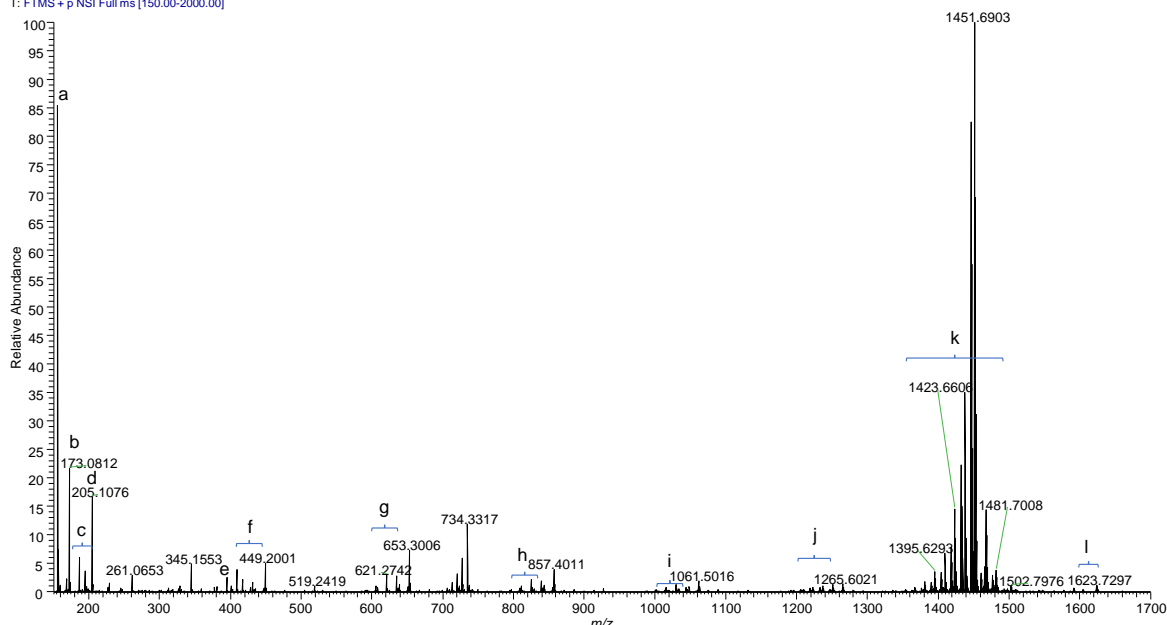

|   | <i>m/z</i> experimental | Name                                                            | <i>m/z</i> calculation | Error   |
|---|-------------------------|-----------------------------------------------------------------|------------------------|---------|
| a | 155.0706                | [TMglc-H <sub>2</sub> O-CH <sub>3</sub> OH+H] <sup>+</sup>      | 155.0703               | 1.9 ppm |
| b | 173.0812                | [TMglc-CH <sub>3</sub> OH+H] <sup>+</sup>                       | 173.0808               | 2.3 ppm |
|   | 187.0970                | [TMglc-H <sub>2</sub> O+H] <sup>+</sup>                         | 187.0965               | 2.7 ppm |
| c | 191.0919                | [TMglc-CH <sub>2</sub> +H] <sup>+</sup>                         | 191.0914               | 2.6 ppm |
|   | 195.0289                | [Cp <sub>2</sub> Ti(OH)] <sup>+</sup>                           | 195.0284               | 2.6 ppm |
| d | 205.1076                | [TMglc+H] <sup>+</sup>                                          | 205.1071               | 2.4 ppm |
| e | 381.1764                | [TMglc <sub>2</sub> -2CH <sub>2</sub> +H] <sup>+</sup>          | 381.1755               | 2.4 ppm |
|   | 395.1920                | [TMglc <sub>2</sub> -CH <sub>2</sub> +H] <sup>+</sup>           | 395.1912               | 2.0 ppm |
|   | 409.2077                | [TMglc <sub>2</sub> +H] <sup>+</sup>                            | 409.2068               | 2.2 ppm |
| f | 417.1740                | [TMglc <sub>2</sub> -CH <sub>2</sub> +Na] <sup>+</sup>          | 417.1731               | 2.2 ppm |
|   | 431.1896                | [TMglc <sub>2</sub> +Na] <sup>+</sup>                           | 431.1888               | 1.9 ppm |
|   | 607.2583                | [TMglc <sub>3</sub> -2CH <sub>2</sub> +Na] <sup>+</sup>         | 607.2572               | 1.8 ppm |
| g | 621.2742                | [TMglc <sub>3</sub> -CH <sub>2</sub> +Na] <sup>+</sup>          | 621.2729               | 2.1 ppm |
|   | 635.2899                | [TMglc <sub>3</sub> +Na] <sup>+</sup>                           | 635.2885               | 2.2 ppm |
|   | 811.3591                | [TMglc <sub>4</sub> -2CH <sub>2</sub> +Na] <sup>+</sup>         | 811.3570               | 2.6 ppm |
| h | 825.3748                | [TMglc <sub>4</sub> -CH <sub>2</sub> +Na] <sup>+</sup>          | 825.3727               | 2.5 ppm |
|   | 839.3905                | [TMglc <sub>4</sub> +Na] <sup>+</sup>                           | 839.3883               | 2.6 ppm |
|   | 1015.4596               | [TMglc <sub>5</sub> -2CH <sub>2</sub> +Na] <sup>+</sup>         | 1015.4568              | 2.8 ppm |
| i | 1029.4754               | [TMglc <sub>5</sub> -CH <sub>2</sub> +Na] <sup>+</sup>          | 1029.4724              | 2.9 ppm |
|   | 1043.4909               | [TMglc <sub>5</sub> +Na] <sup>+</sup>                           | 1043.4881              | 2.7 ppm |
|   | 1205.5443               | [TMglc <sub>6</sub> -3CH <sub>2</sub> +Na] <sup>+</sup>         | 1205.5409              | 2.8 ppm |
| j | 1219.5601               | [TMglc <sub>6</sub> -2CH <sub>2</sub> +Na] <sup>+</sup>         | 1219.5566              | 2.9 ppm |
|   | 1233.5757               | [TMglc <sub>6</sub> -CH <sub>2</sub> +Na] <sup>+</sup>          | 1233.5722              | 2.8 ppm |
|   | 1247.5910               | [TMglc <sub>6</sub> +Na] <sup>+</sup>                           | 1247.5879              | 2.5 ppm |
|   | 1353.5825               | [TM $\beta$ CD-7CH <sub>2</sub> +Na] <sup>+</sup>               | 1353.5781              | 3.3 ppm |
|   | 1367.5980               | [TM $\beta$ CD-6CH <sub>2</sub> +Na] <sup>+</sup>               | 1367.5937              | 3.1 ppm |
| k | 1376.6583               | [TM $\beta$ CD-5CH <sub>2</sub> +NH <sub>4</sub> ] <sup>+</sup> | 1376.6540              | 3.1 ppm |
|   | 1381.6139               | [TM $\beta$ CD-5CH <sub>2</sub> +Na] <sup>+</sup>               | 1381.6094              | 3.3 ppm |
|   | 1390.6741               | [TM $\beta$ CD-4CH <sub>2</sub> +NH <sub>4</sub> ] <sup>+</sup> | 1390.6696              | 3.2 ppm |
|   | 1395.6293               | [TM $\beta$ CD-4CH <sub>2</sub> +Na] <sup>+</sup>               | 1395.6250              | 3.1 ppm |

|   |           |                                                             |           |          |
|---|-----------|-------------------------------------------------------------|-----------|----------|
|   | 1404.6898 | [TMβCD-3CH <sub>2</sub> +NH <sub>4</sub> ] <sup>+</sup>     | 1404.6853 | 3.2 ppm  |
|   | 1409.6450 | [TMβCD-3CH <sub>2</sub> +Na] <sup>+</sup>                   | 1409.6407 | 3.1 ppm  |
|   | 1418.7052 | [TMβCD-2CH <sub>2</sub> +NH <sub>4</sub> ] <sup>+</sup>     | 1418.7009 | 3.0 ppm  |
|   | 1423.6606 | [TMβCD-2CH <sub>2</sub> +Na] <sup>+</sup>                   | 1423.6563 | 3.0 ppm  |
|   | 1425.6143 | [TMβCD-3CH <sub>2</sub> +K] <sup>+</sup>                    | 1425.6146 | -0.2 ppm |
|   | 1432.7207 | [TMβCD-CH <sub>2</sub> +NH <sub>4</sub> ] <sup>+</sup>      | 1432.7166 | 2.9 ppm  |
|   | 1437.6758 | [TMβCD-CH <sub>2</sub> +Na] <sup>+</sup>                    | 1437.6720 | 2.6 ppm  |
|   | 1439.6329 | [TMβCD-2CH <sub>2</sub> +K] <sup>+</sup>                    | 1439.6303 | 1.8 ppm  |
|   | 1446.7355 | [TMβCD+NH <sub>4</sub> ] <sup>+</sup>                       | 1446.7322 | 2.3 ppm  |
|   | 1451.6903 | [TMβCD+Na] <sup>+</sup>                                     | 1451.6876 | 1.9 ppm  |
|   | 1453.6492 | [TMβCD-CH <sub>2</sub> +K] <sup>+</sup>                     | 1453.6459 | 2.3 ppm  |
|   | 1467.6645 | [TMβCD+K] <sup>+</sup>                                      | 1467.6616 | 2.0 ppm  |
| 1 | 1577.6880 | [TMβCD-2CH <sub>2</sub> +Cp <sub>2</sub> Ti-H] <sup>+</sup> | 1577.6849 | 2.0 ppm  |
|   | 1591.7036 | [TMβCD-CH <sub>2</sub> +Cp <sub>2</sub> Ti-H] <sup>+</sup>  | 1591.7006 | 1.9 ppm  |
|   | 1623.7297 | [TMβCD+Cp <sub>2</sub> TiOH] <sup>+</sup>                   | 1623.7268 | 1.8 ppm  |
|   | 1641.7401 | [TMβCD+Cp <sub>2</sub> Ti(OH) <sub>2</sub> +H] <sup>+</sup> | 1641.7374 | 1.6 ppm  |

**Table S25.** Tandem mass spectrum of the TMβ-cyclodextrin/phenylalanine mixture in 50/50 H<sub>2</sub>O/MeCN + 1% FA. Precursor ion: [TMβCD\*+Phe+H]<sup>+</sup> with a total of 19 methyl groups at *m/z* 1566.80, HCD at 15% NCE (42 eV), 100% = 3.53E5.

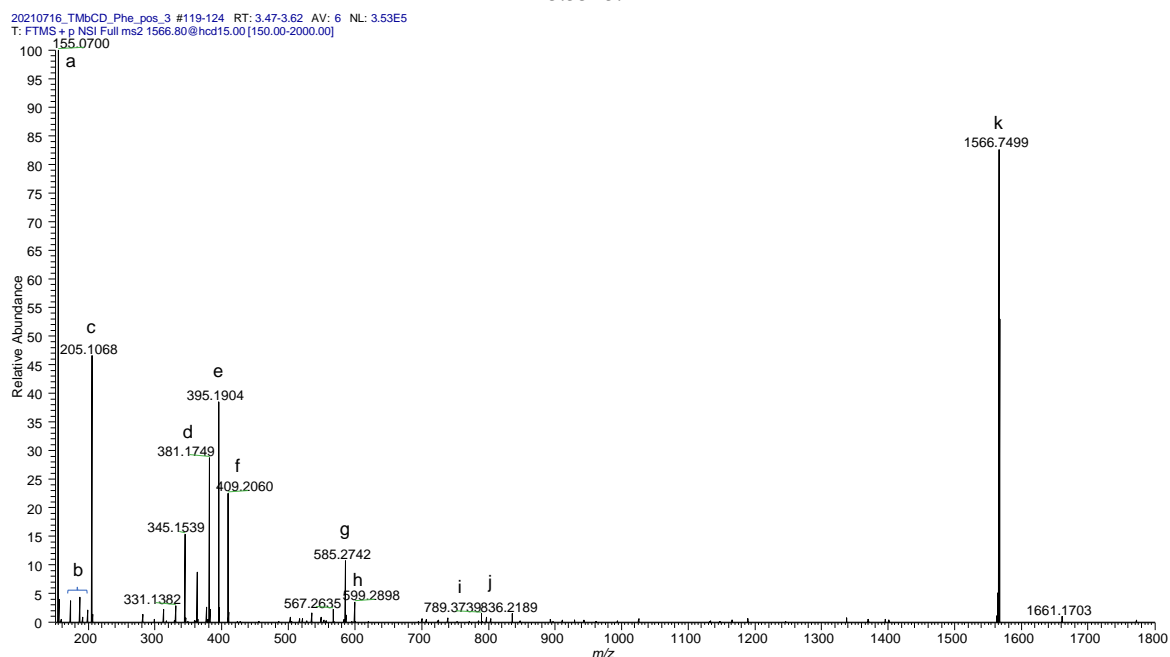

|   | <i>m/z</i> experimental | Name                                                       | <i>m/z</i> calculation | Error    |
|---|-------------------------|------------------------------------------------------------|------------------------|----------|
| a | 155.0700                | [TMglc-H <sub>2</sub> O-CH <sub>3</sub> OH+H] <sup>+</sup> | 155.0703               | -1.9 ppm |
|   | 173.0805                | [TMglc-CH <sub>3</sub> OH+H] <sup>+</sup>                  | 173.0808               | -1.7 ppm |
| b | 187.0962                | [TMglc-H <sub>2</sub> O+H] <sup>+</sup>                    | 187.0965               | -1.6 ppm |
|   | 191.0911                | [TMglc-CH <sub>2</sub> +H] <sup>+</sup>                    | 191.0914               | -1.6 ppm |
| c | 205.1068                | [TMglc+H] <sup>+</sup>                                     | 205.1071               | -1.5 ppm |
| d | 381.1749                | [TMglc <sub>2</sub> -2CH <sub>2</sub> +H] <sup>+</sup>     | 381.1755               | -1.6 ppm |
| e | 395.1904                | [TMglc <sub>2</sub> -CH <sub>2</sub> +H] <sup>+</sup>      | 395.1912               | -2.0 ppm |
| f | 409.2060                | [TMglc <sub>2</sub> +H] <sup>+</sup>                       | 409.2068               | -2.0 ppm |
| g | 585.2742                | [TMglc <sub>3</sub> -2CH <sub>2</sub> +H] <sup>+</sup>     | 585.2753               | -1.9 ppm |
| h | 599.2898                | [TMglc <sub>3</sub> -CH <sub>2</sub> +H] <sup>+</sup>      | 599.2909               | -1.8 ppm |
| i | 789.3739                | [TMglc <sub>4</sub> -2CH <sub>2</sub> +H] <sup>+</sup>     | 789.3751               | -1.5 ppm |
| j | 803.3894                | [TMglc <sub>4</sub> -CH <sub>2</sub> +H] <sup>+</sup>      | 803.3907               | -1.6 ppm |
| k | 1566.7499               | [TMβCD-2CH <sub>2</sub> +Phe+H] <sup>+</sup>               | 1566.7534              | -2.2 ppm |

**Table S26.** Tandem mass spectrum of the TM $\beta$ -cyclodextrin/phenylalanine mixture in 50/50 H<sub>2</sub>O/MeCN + 1% FA. Precursor ion: [TM $\beta$ CD<sup>+</sup>+Phe+H]<sup>+</sup> with a total of 20 methyl groups at *m/z* 1580.80, HCD at 15% NCE (42 eV), 100% = 6.11E5.

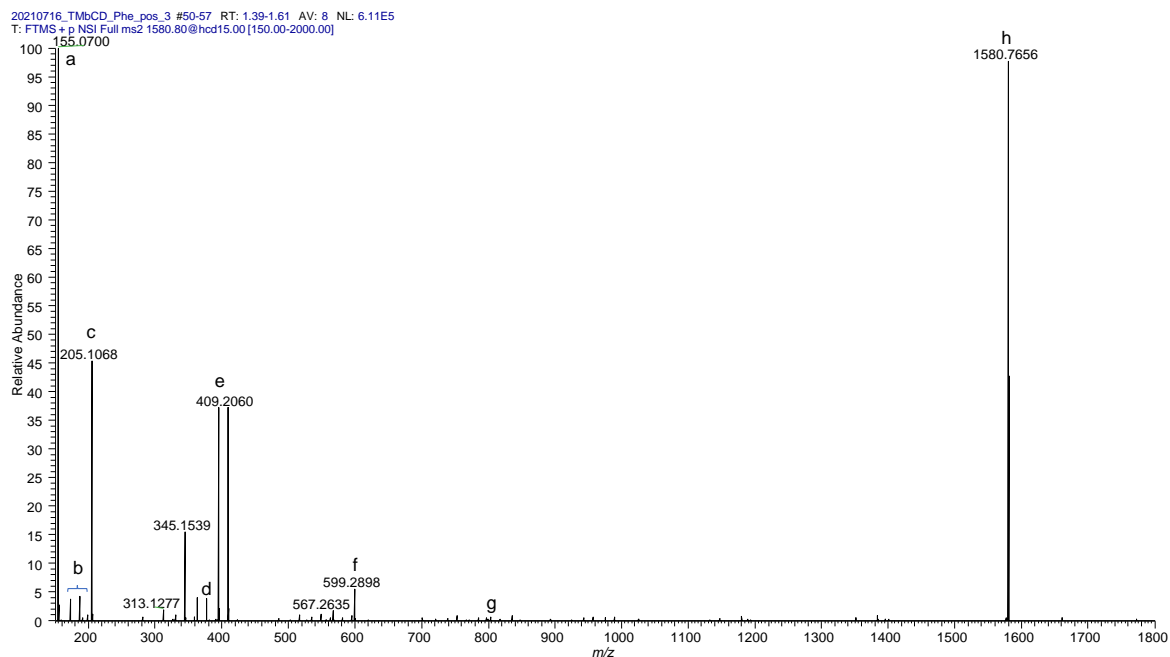

|   | <i>m/z</i> experimental | Name                                                       | <i>m/z</i> calculation | Error    |
|---|-------------------------|------------------------------------------------------------|------------------------|----------|
| a | 155.07                  | [TMglc-H <sub>2</sub> O-CH <sub>3</sub> OH+H] <sup>+</sup> | 155.0703               | -1.9 ppm |
|   | 173.0805                | [TMglc-CH <sub>3</sub> OH+H] <sup>+</sup>                  | 173.0808               | -1.7 ppm |
| b | 187.0962                | [TMglc-H <sub>2</sub> O+H] <sup>+</sup>                    | 187.0965               | -1.6 ppm |
|   | 191.0911                | [TMglc-CH <sub>2</sub> +H] <sup>+</sup>                    | 191.0914               | -1.6 ppm |
| c | 205.1068                | [TMglc+H] <sup>+</sup>                                     | 205.1071               | -1.5 ppm |
| d | 395.1904                | [TMglc <sub>2</sub> -CH <sub>2</sub> +H] <sup>+</sup>      | 395.1912               | -2.0 ppm |
| e | 409.206                 | [TMglc <sub>2</sub> +H] <sup>+</sup>                       | 409.2068               | -2.0 ppm |
| f | 599.2898                | [TMglc <sub>3</sub> -CH <sub>2</sub> +H] <sup>+</sup>      | 599.2909               | -1.8 ppm |
| g | 803.3895                | [TMglc <sub>4</sub> -CH <sub>2</sub> +H] <sup>+</sup>      | 803.3907               | -1.5 ppm |
| h | 1580.7656               | [TMβCD-CH <sub>2</sub> +Phe+H] <sup>+</sup>                | 1580.7690              | -2.2 ppm |

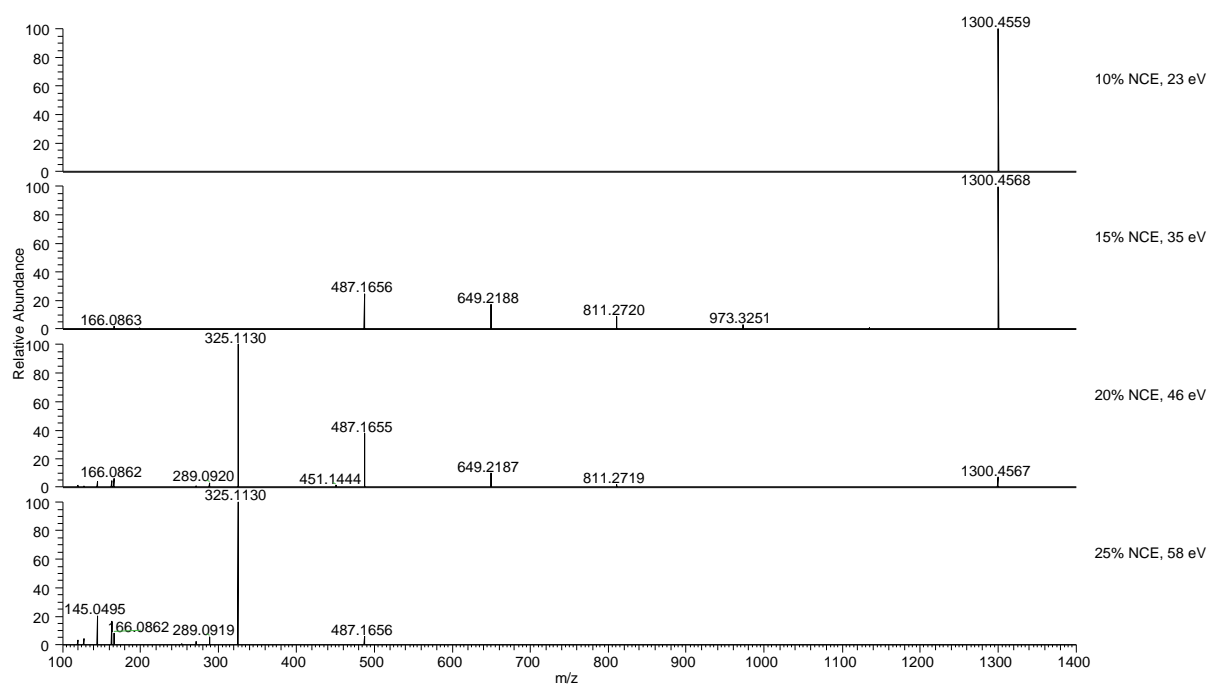

**Figure S1.** Tandem mass spectra of the  $\beta$ -cyclodextrin/phenylalanine mixture underlying the breakdown curve of  $[\beta\text{CD}+\text{Phe}+\text{H}]^+$ .

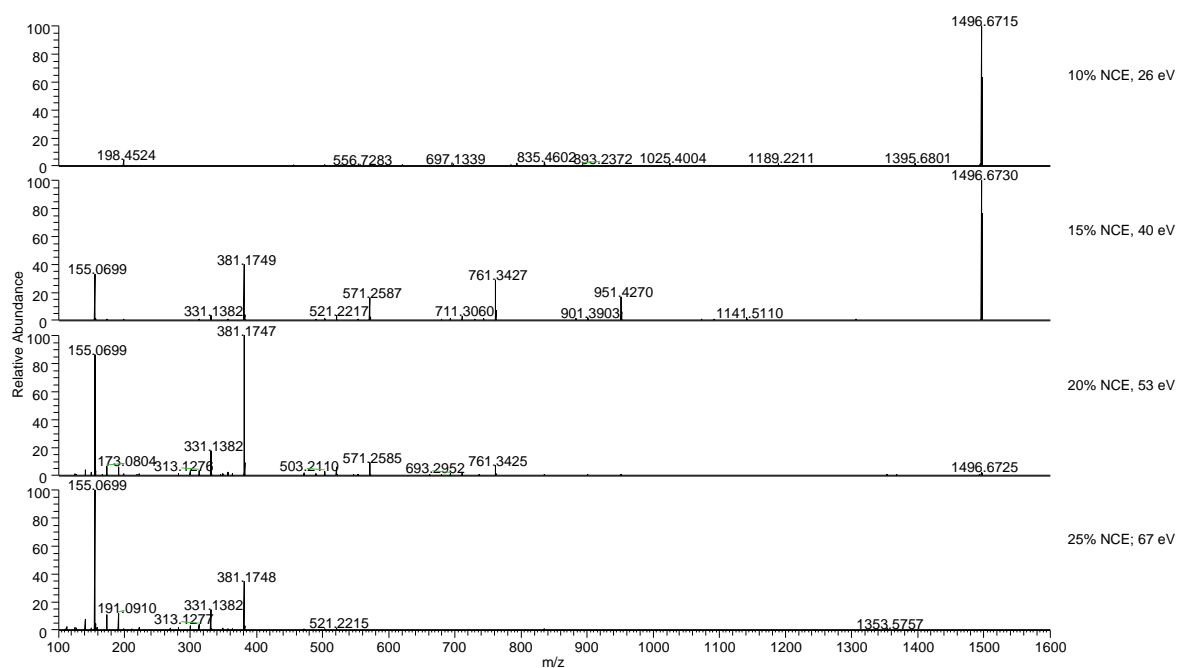

**Figure S2.** Tandem mass spectra of the  $\text{DM}\beta$ -cyclodextrin/phenylalanine mixture underlying the breakdown curve of  $[\text{DM}\beta\text{CD}+\text{Phe}+\text{H}]^+$ .

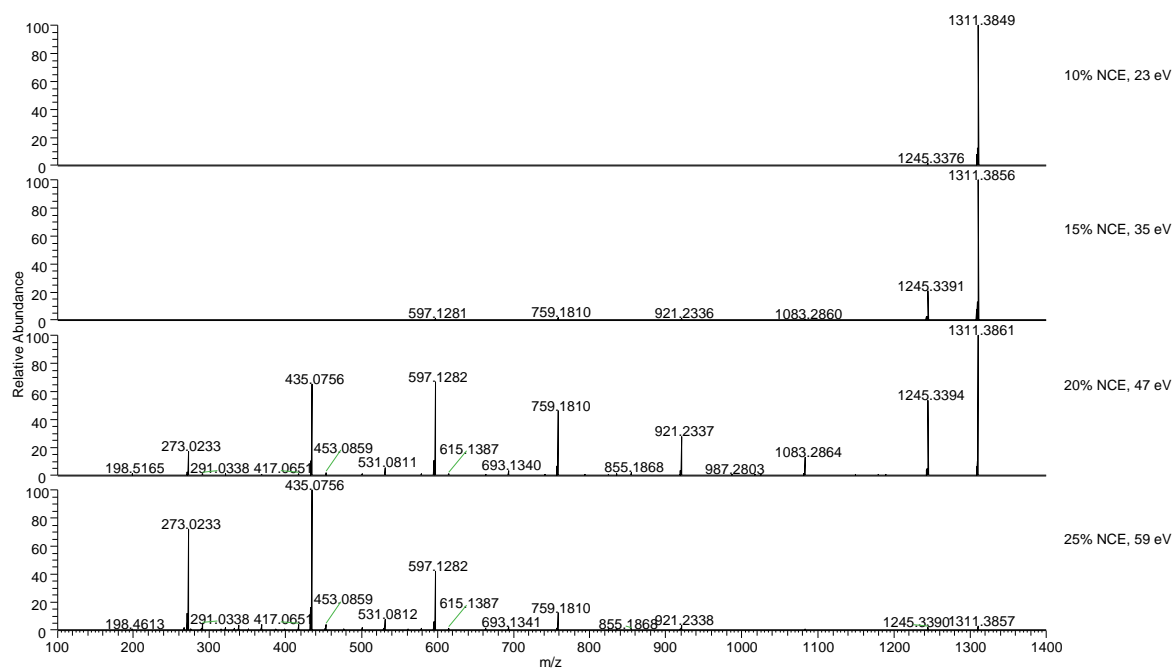

**Figure S3.** Tandem mass spectra of the  $\beta$ -cyclodextrin/titanocene dichloride mixture underlying the breakdown curve of  $[\beta\text{CD}+\text{Cp}_2\text{Ti-H}]^+$ .

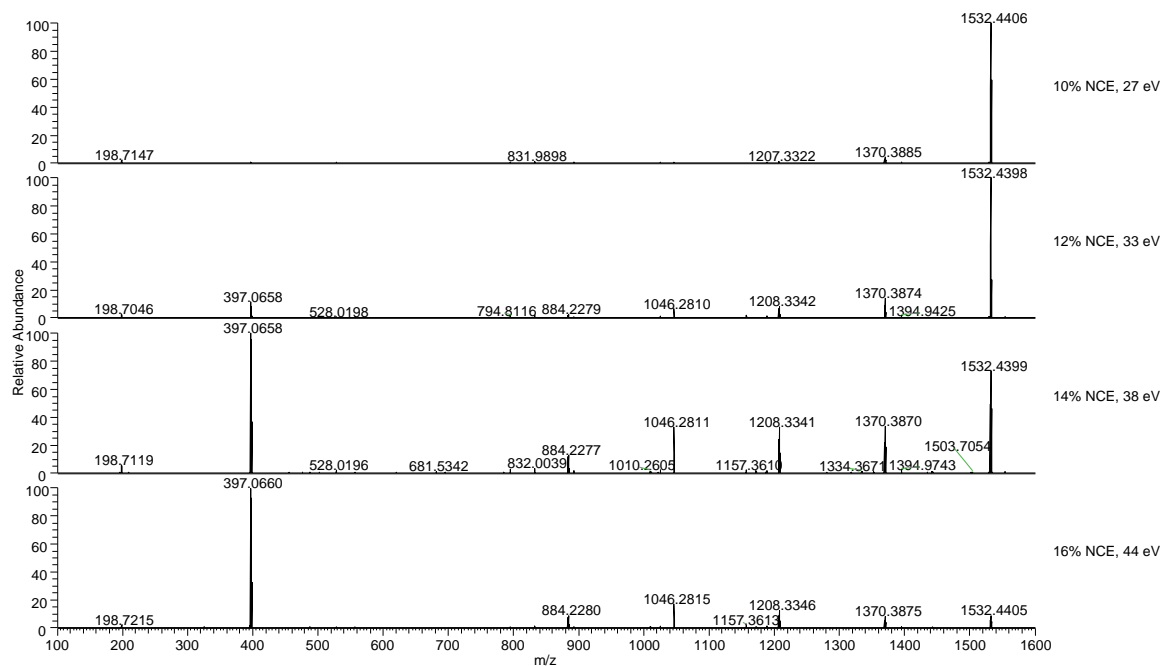

**Figure S4.** Tandem mass spectra of the  $\beta$ -cyclodextrin/oxaliplatin mixture underlying the breakdown curve of  $[\beta\text{CD}+\text{oxaliPt}+\text{H}]^+$ .
